# Supplementary material for: The chromatin landscape of pathogenic transcriptional cell states in rheumatoid arthritis
Source: PubMed Central journal article supplement (PMC11143375; doi:10.1038/s41467-024-48620-7), 2024-05-31
Supplement: 41467_2024_48620_MOESM2_ESM.pdf [file 41467_2024_48620_MOESM2_ESM.pdf]

The chromatin landscape of pathogenic transcriptional cell states in rheumatoid arthritis

Kathryn Weinand, Saori Sakaue, Aparna Nathan, Anna Helena Jonsson, Fan Zhang, Gerald F. M. Watts, Majd Al Suqri, Zhu Zhu, Accelerating Medicines Partnership Program: Rheumatoid Arthritis and Systemic Lupus Erythematosus (AMP RA/SLE) Network, Deepak A. Rao, Jennifer H. Anolik, Michael B. Brenner, Laura T. Donlin, Kevin Wei, Soumya Raychaudhuri

**Supplementary Figures and Tables**

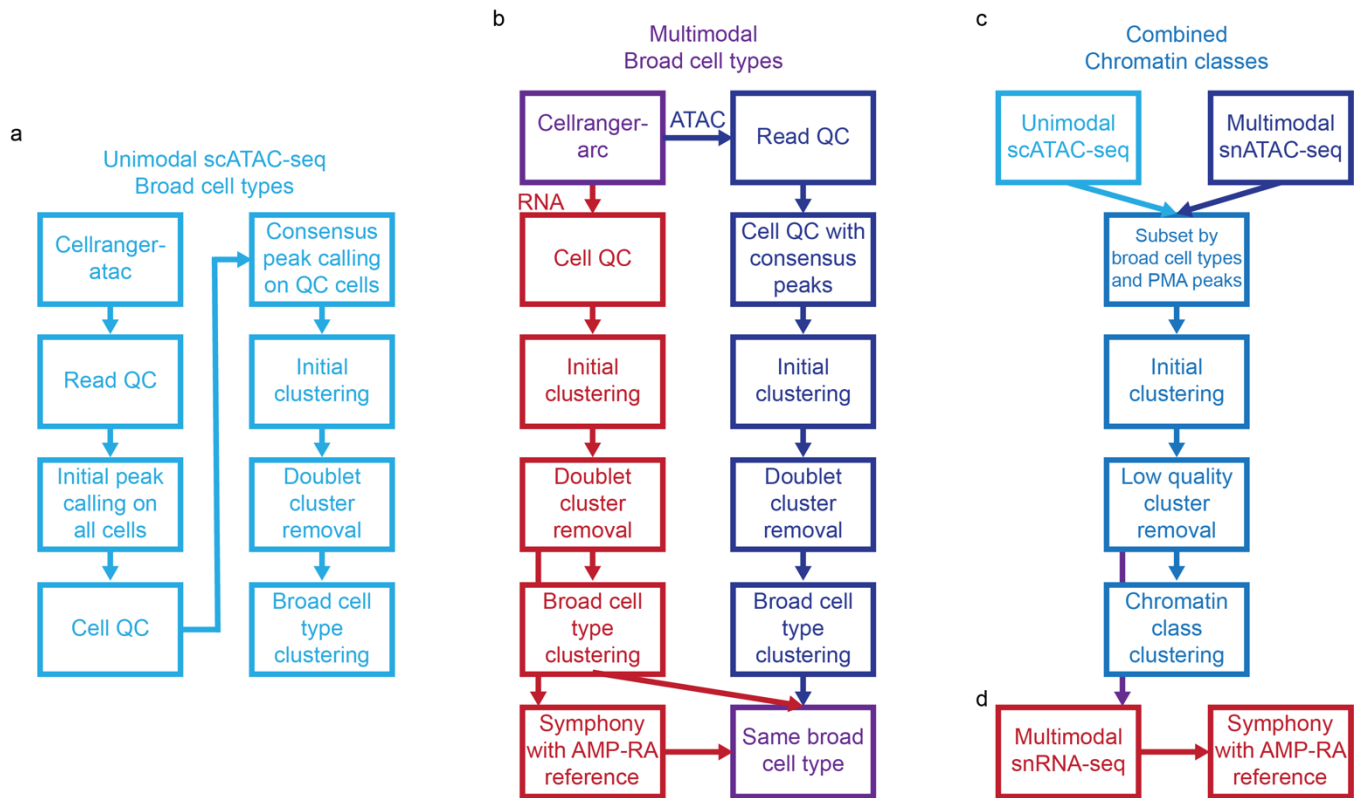

**Supplementary Fig. 1.** Computational methods workflows for cell type, chromatin class, and transcriptional cell state annotations.

**a.** Unimodal scATAC-seq (light blue) workflow from 10x Genomics Cell Ranger ATAC 1.1.0 to broad cell type clustering.

**b.** Multiome (purple) workflow for both snATAC-seq (dark blue) and snRNA-seq (red) from 10x Genomics Cell Ranger ARC 2.0.0 to broad cell type clustering. In addition to calling broad cell types within each modality, we used the non-doublet multimodal snRNA-seq cells as a query dataset to map onto the AMP-RA synovial tissue CITE-seq broad cell type reference<sup>14</sup> using Symphony<sup>95</sup>. We removed any cells whose broad cell types did not match for all three annotations (snATAC-seq broad cell type, snRNA-seq broad cell type, and classified AMP-RA broad cell type).

**c.** Chromatin class (middle blue) workflow from combining unimodal scATAC-seq and multimodal snATAC-seq at the broad cell type level to chromatin class clustering.

**d.** Transcriptional cell state workflow using multimodal snRNA-seq cells as queries to map onto the AMP-RA synovial tissue CITE-seq references<sup>14</sup> using Symphony<sup>95</sup>. This is done for each cell type using the cells with chromatin class annotations.

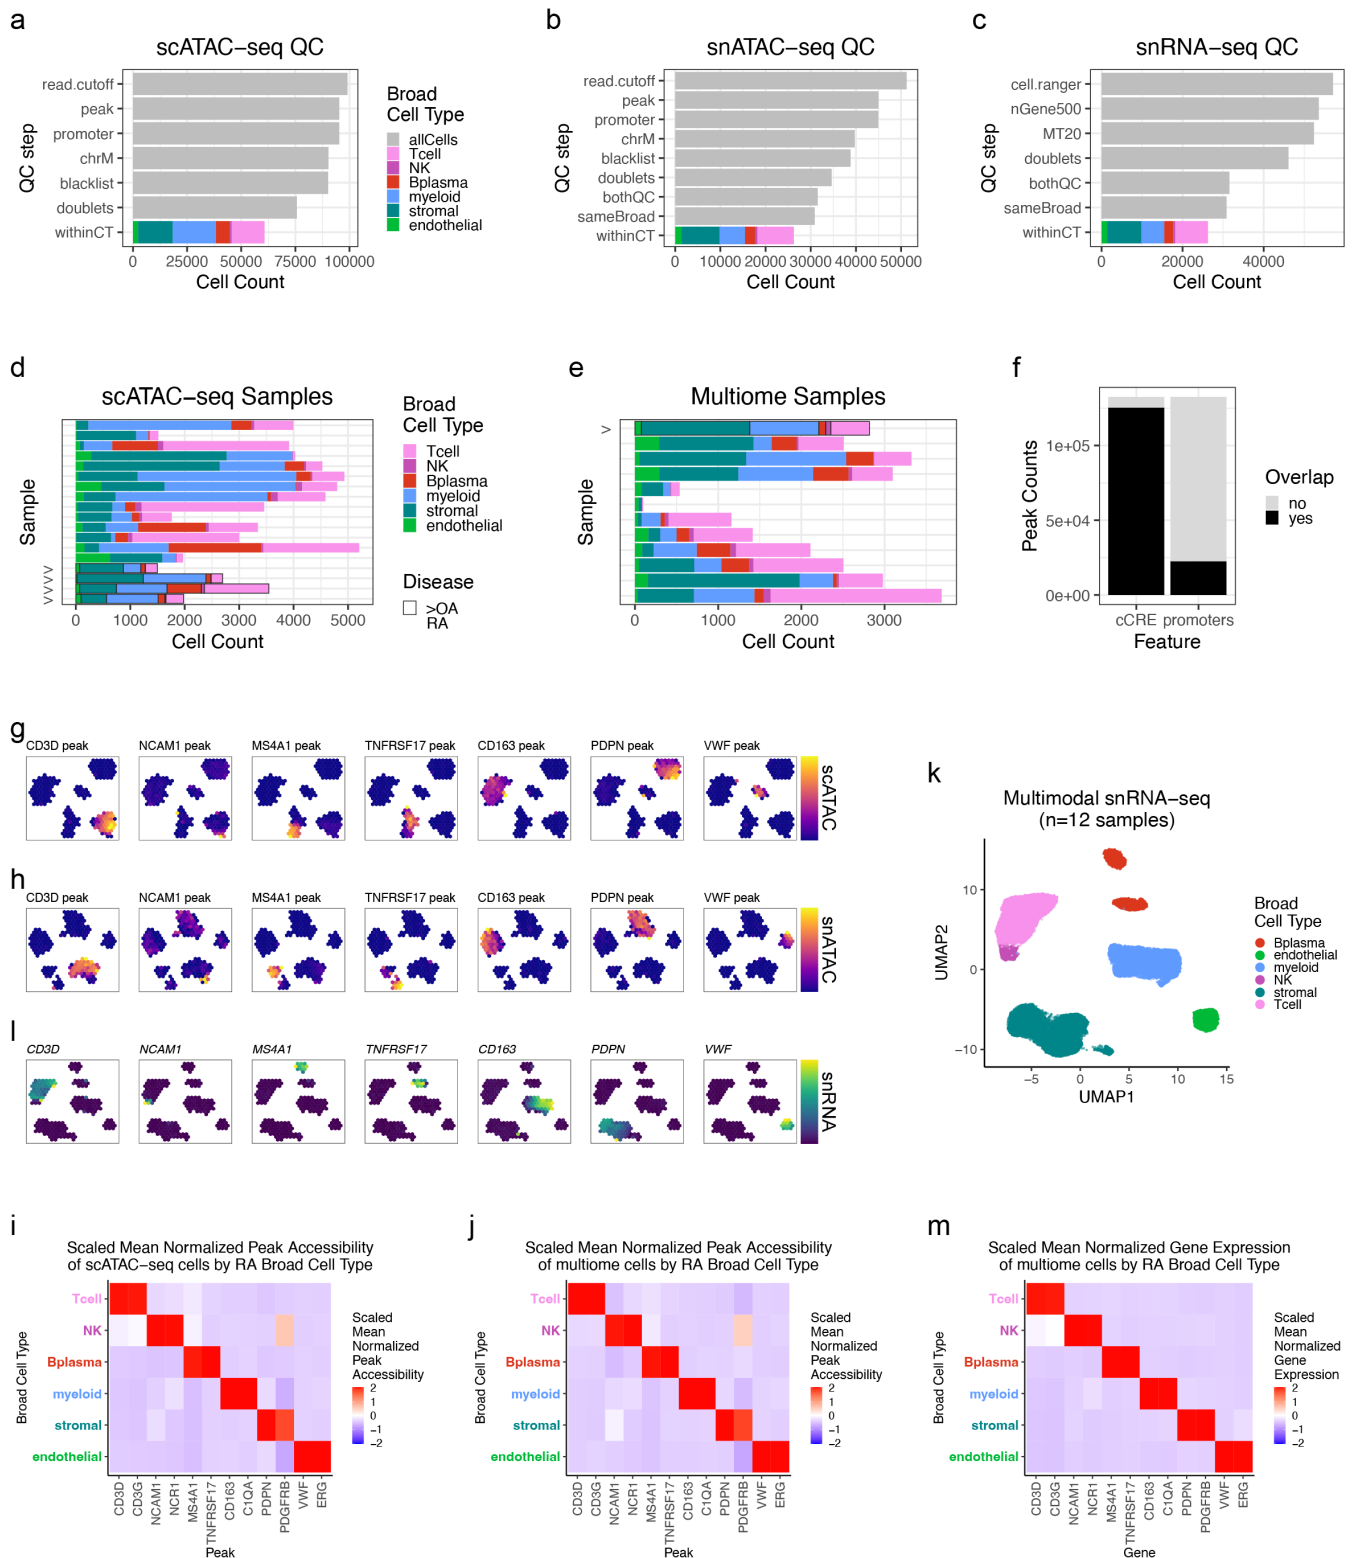

**Supplementary Fig. 2. Quality Control Measures and Broad Cell Type Markers.**

**a.-c.** Quality control steps ending in the final cell counts for all broad cell types in (a.) unimodal scATAC-seq, (b.) multimodal snATAC-seq, and (c.) multimodal snRNA-seq datasets.

**d.-e.** Broad cell type cell counts per sample for (d.) unimodal and (e.) multimodal datasets. OA samples are highlighted with a ‘>’ symbol and black bar outlines.

**f.** Number of trimmed open chromatin peaks overlapping ENCODE cCREs<sup>25</sup> and promoters<sup>26</sup>.

- g.-h.** Binned normalized marker peak accessibility visualized across broad cell types on the corresponding UMAPs for **(g.)** unimodal scATAC-seq and **(h.)** multimodal snATAC-seq datasets.
- i.-j.** Scaled mean normalized marker peak accessibility across broad cell types for **(i.)** unimodal scATAC-seq and **(j.)** multimodal snATAC-seq datasets.
- k.** Broad cell type identification for multiome snRNA-seq cells visualized on a UMAP.
- l.** Binned normalized marker gene expression visualized across broad cell types on the corresponding UMAP for multimodal snRNA-seq datasets.
- m.** Scaled mean normalized marker gene expression across broad cell types for multimodal snRNA-seq datasets.

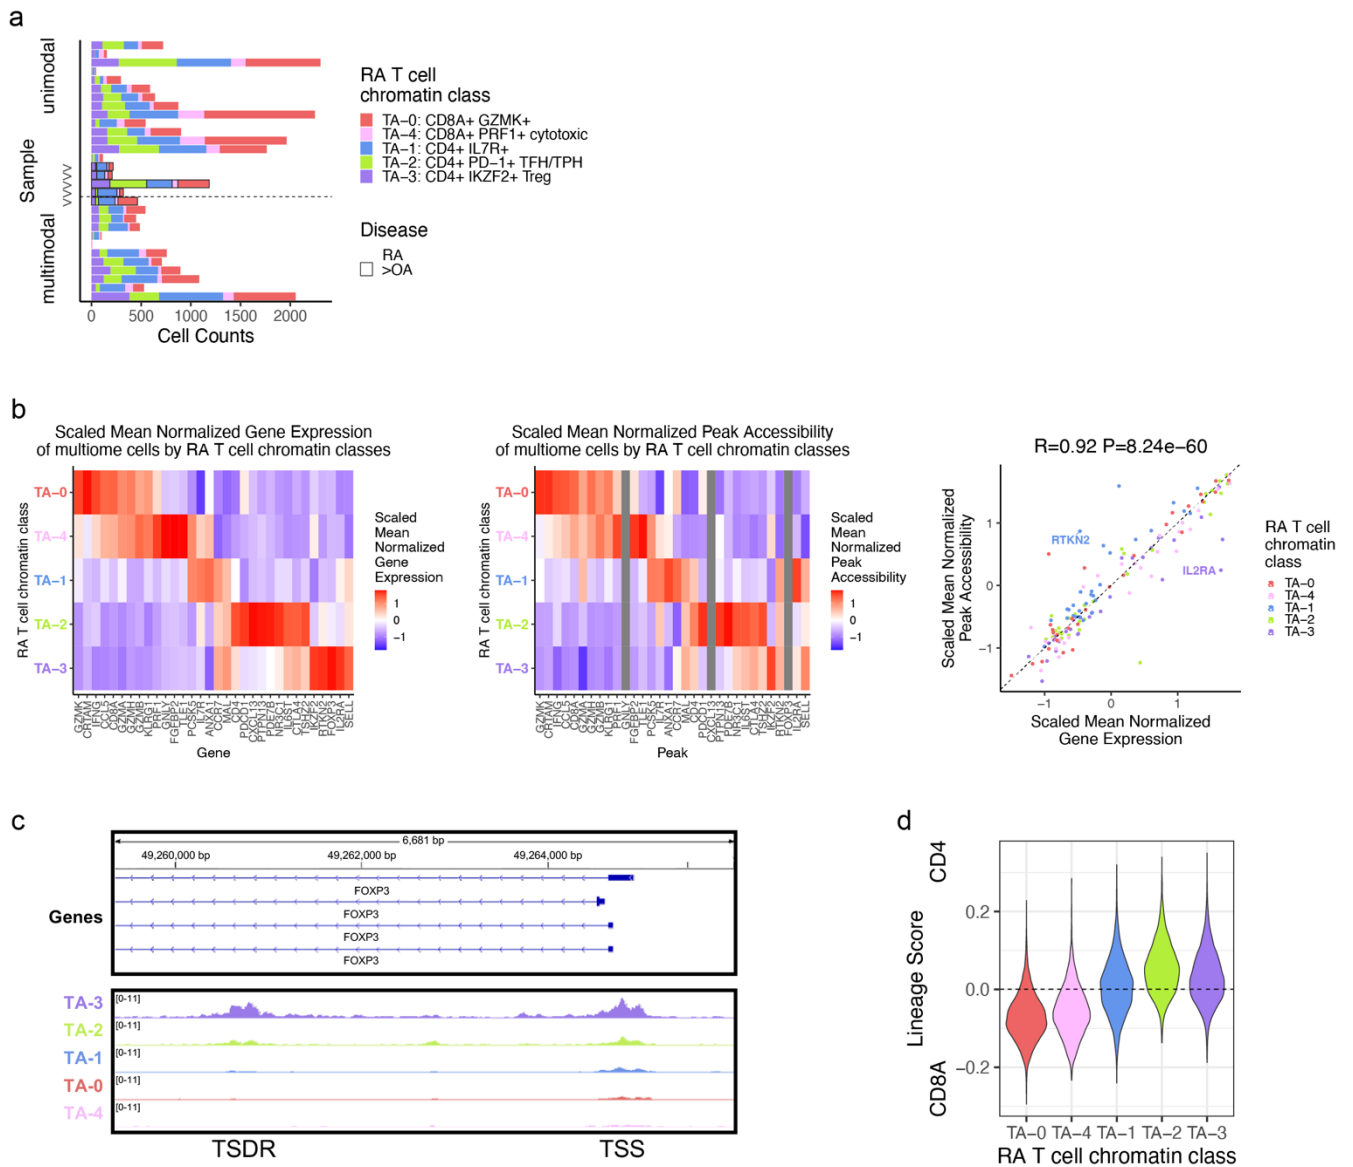

**Supplementary Fig. 3.** Further analyses of RA T cell chromatin classes.

**a.** T cell chromatin class cell counts per sample for unimodal and multimodal datasets. OA samples are highlighted with a ‘>’ symbol and black bar outlines.

**b.** Scaled mean normalized marker gene expression (**left**) and peak accessibility (**middle**) across T cell chromatin classes in multimodal datasets and the Pearson correlation (R) and two-sided p-value (P) between them (**right**). Genes without an overlapping promoter peak are colored in grey in the **middle** panel. On the **right**, correlation calculated from 145 gene/class combinations.

**c.** FOXP3 locus (chrX:49,259,337-49,266,016) with selected gene isoforms and chromatin accessibility reads aggregated by chromatin class and scaled by read counts per class (**Methods**). Transcriptional start site (TSS) and Treg-specific demethylated region<sup>29</sup> (TSDR) highlighted as areas of selective open chromatin in T<sub>A</sub>-3: CD4+ IKZF2+ Tregs.

**d.** Lineage score by cell based on normalized peak accessibility for T cell lineage-associated promoter peaks (**Methods**), segregated by T cell chromatin classes.

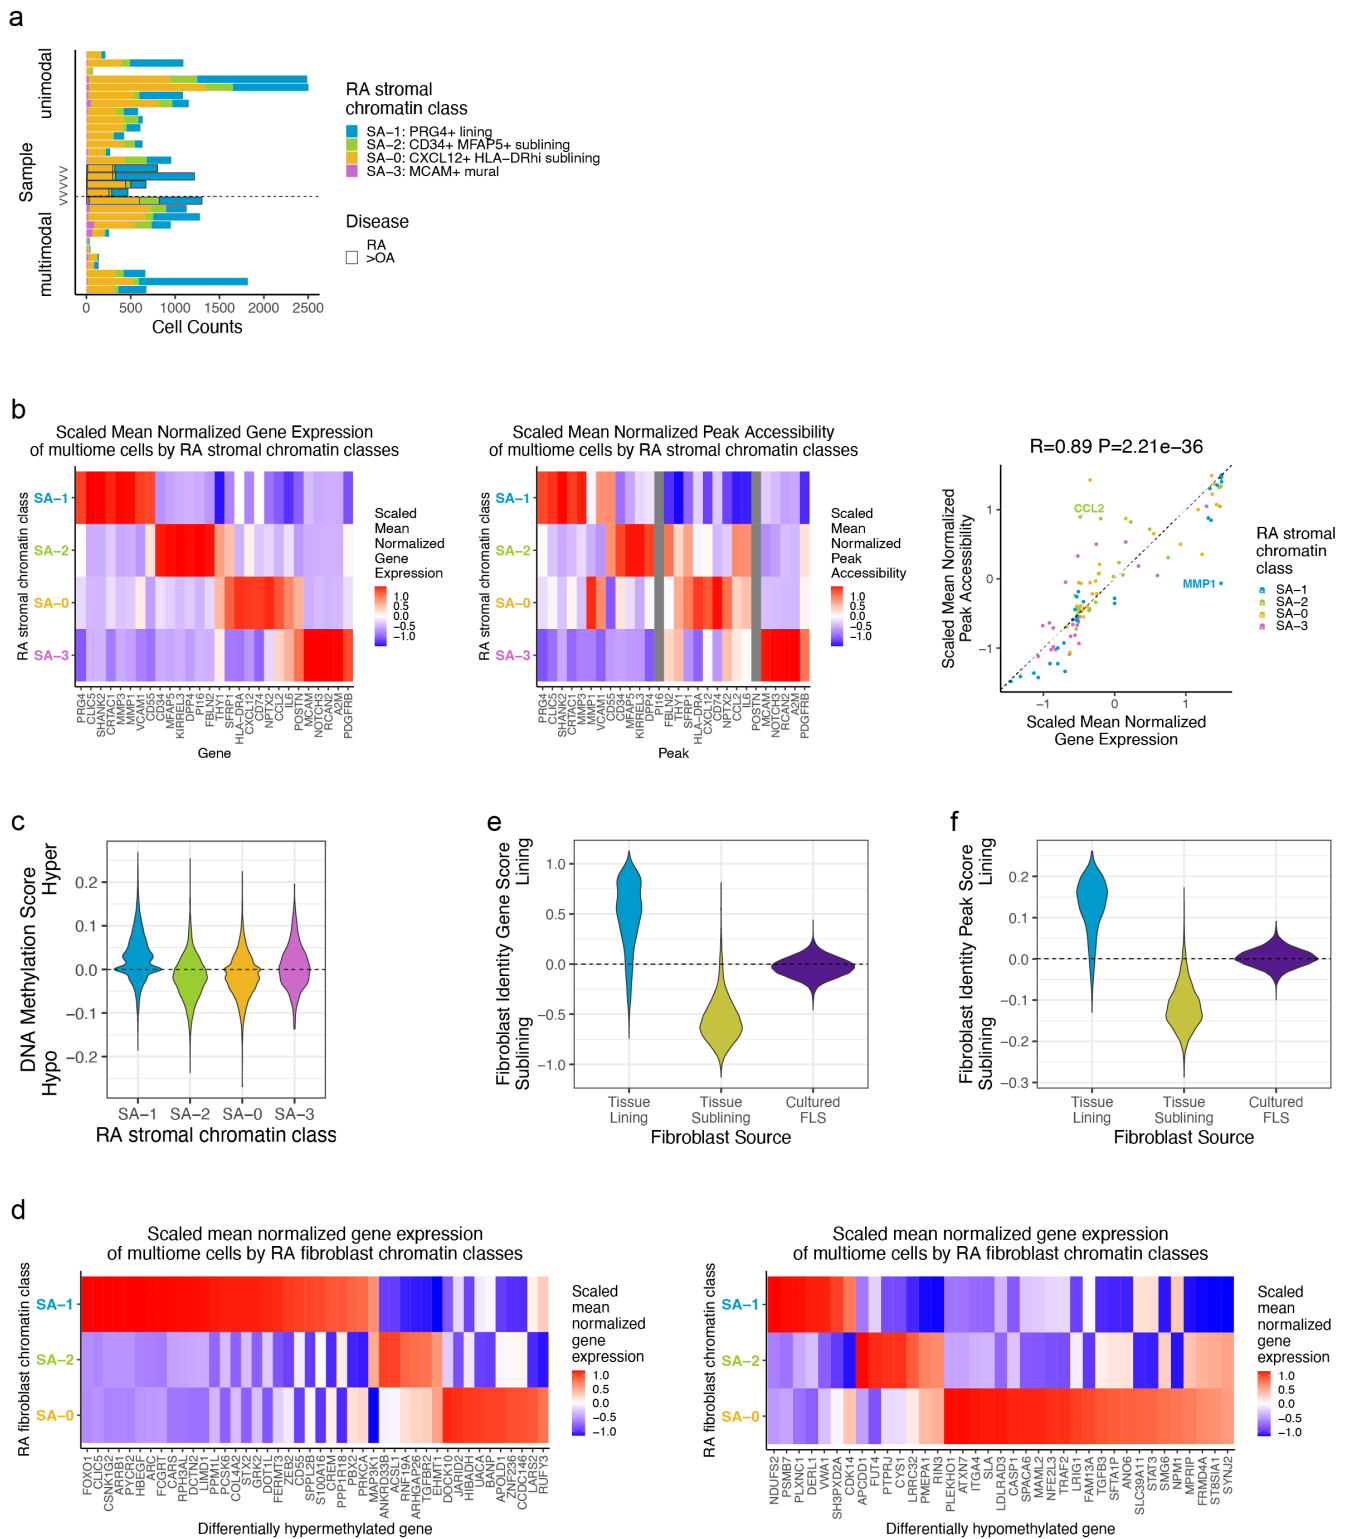

**Supplementary Fig. 4. Further analyses of RA stromal chromatin classes.**

**a.** Stromal chromatin class cell counts per sample for unimodal and multimodal datasets. OA samples are highlighted with a 'v' symbol and black bar outlines.

**b.** Scaled mean normalized marker gene expression (**left**) and peak accessibility (**middle**) across stromal chromatin classes in multimodal datasets and the Pearson correlation (R) and two-sided p-value (P) between them (**right**). Genes without an overlapping promoter peak are colored in grey in the

**middle** panel. On the **right**, correlation calculated from 104 gene/class combinations.

**c.** DNA methylation score by cell based on normalized peak accessibility for differential DNA methylation-associated promoter peaks (**Methods**), segregated by stromal chromatin classes. Differential methylation was calculated for RA FLS cell lines compared to OA FLS cell lines and obtained from Nakano et al., *Ann Rheum Dis*, 2013<sup>47</sup>.

**d.** Scaled mean normalized gene expression across fibroblast chromatin classes in multimodal datasets for genes associated with hypermethylated (**left**) and hypomethylated (**right**) differentially methylated regions (DMR).

**e-f.** Fibroblast identity score between lining and sublining tissue fibroblasts by cell based on (**e.**) normalized gene expression for differentially expressed genes and (**f.**) normalized peak accessibility for differentially accessible peaks (**Methods**), segregated by fibroblast source. The cultured fibroblast-like synoviocyte (FLS) data was obtained from Smith et al., *Nat Immunol*, 2023<sup>44</sup>. All pairwise combinations of scores by source were significantly different by two-sided Wilcoxon test within both gene- and peak-based metrics.

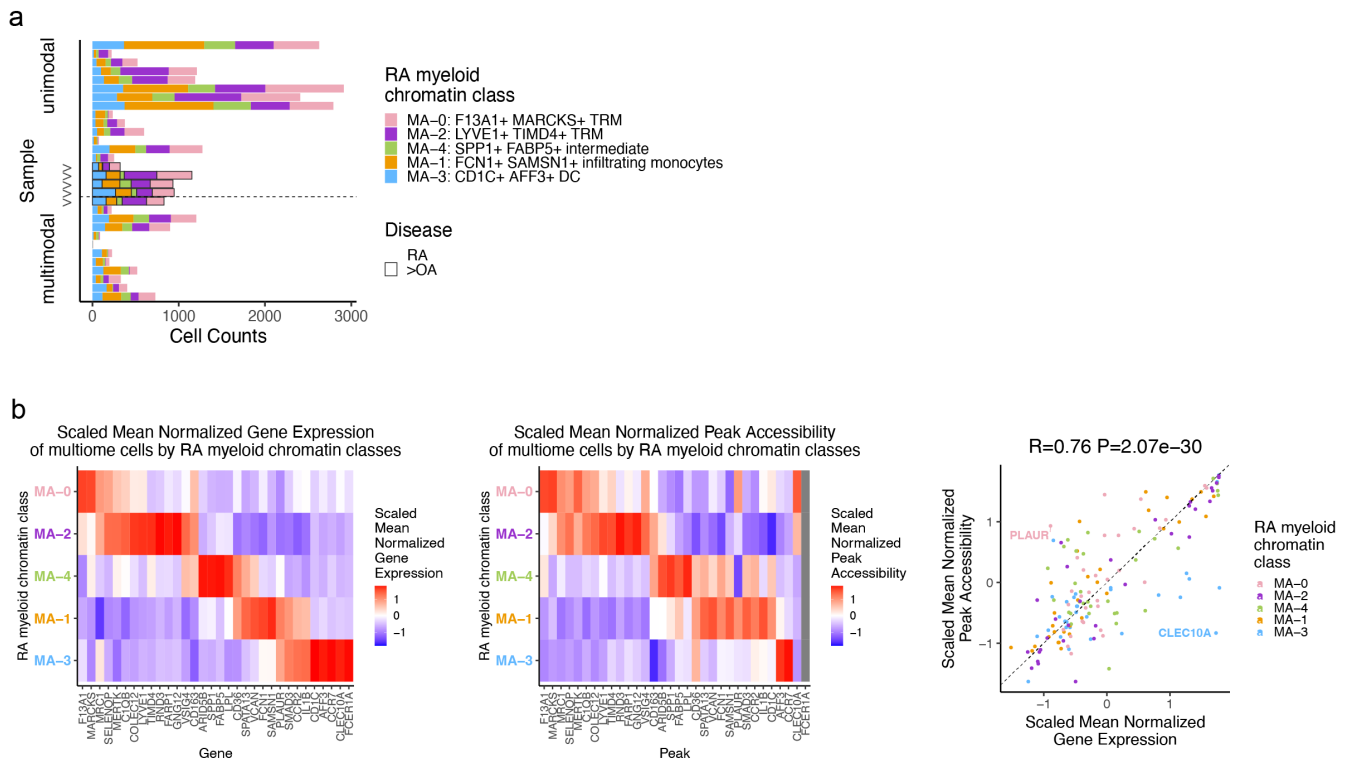

**Supplementary Fig. 5.** Further analyses of RA myeloid chromatin classes.

**a.** Myeloid chromatin class cell counts per sample for unimodal and multimodal datasets. OA samples are highlighted with a ‘>’ symbol and black bar outlines.

**b.** Scaled mean normalized marker gene expression (**left**) and peak accessibility (**middle**) across myeloid chromatin classes in multimodal datasets and the Pearson correlation (R) and two-sided p-value (P) between them (**right**). Genes without an overlapping promoter peak are colored in grey in the **middle** panel. On the **right**, correlation calculated from 155 gene/class combinations.



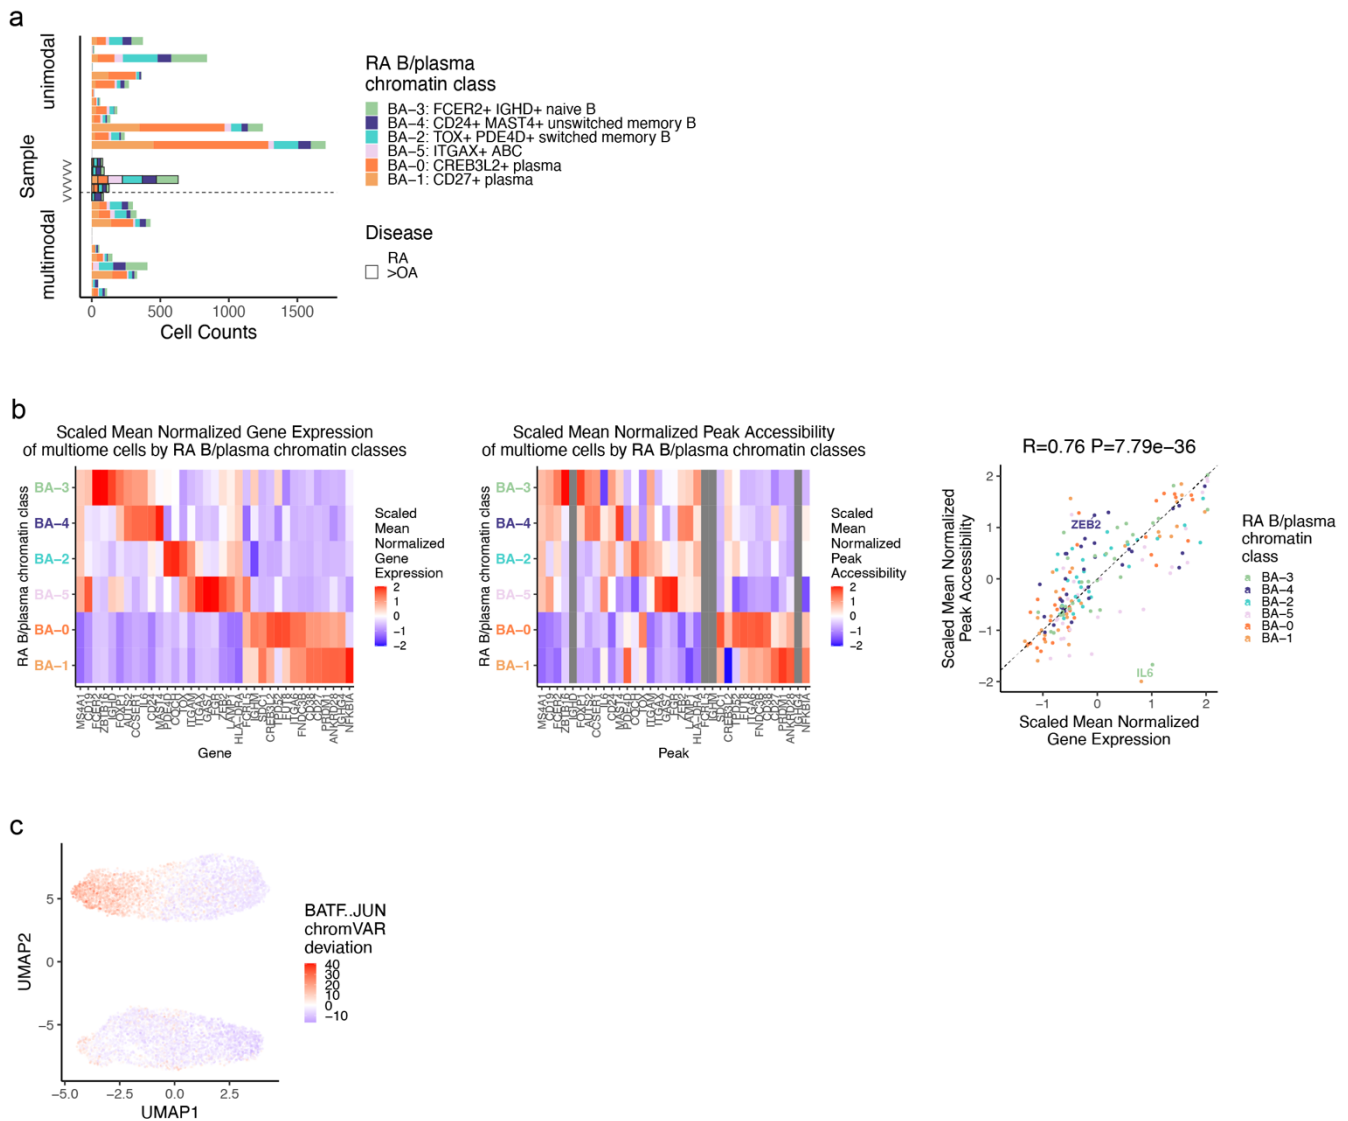

**Supplementary Fig. 6.** Further analyses of RA B/plasma chromatin classes.

**a.** B/plasma chromatin class cell counts per sample for unimodal and multimodal datasets. OA samples are highlighted with a ‘>’ symbol and black bar outlines.

**b.** Scaled mean normalized marker gene expression (**left**) and peak accessibility (**middle**) across B/plasma chromatin classes in multimodal datasets and the Pearson correlation (R) and two-sided p-value (P) between them (**right**). Genes without an overlapping promoter peak are colored in grey in the **middle** panel. On the **right**, correlation calculated from 186 gene/class combinations.

**c.** UMAP colored by chromVAR<sup>34</sup> deviations for the BATF..JUN motif.

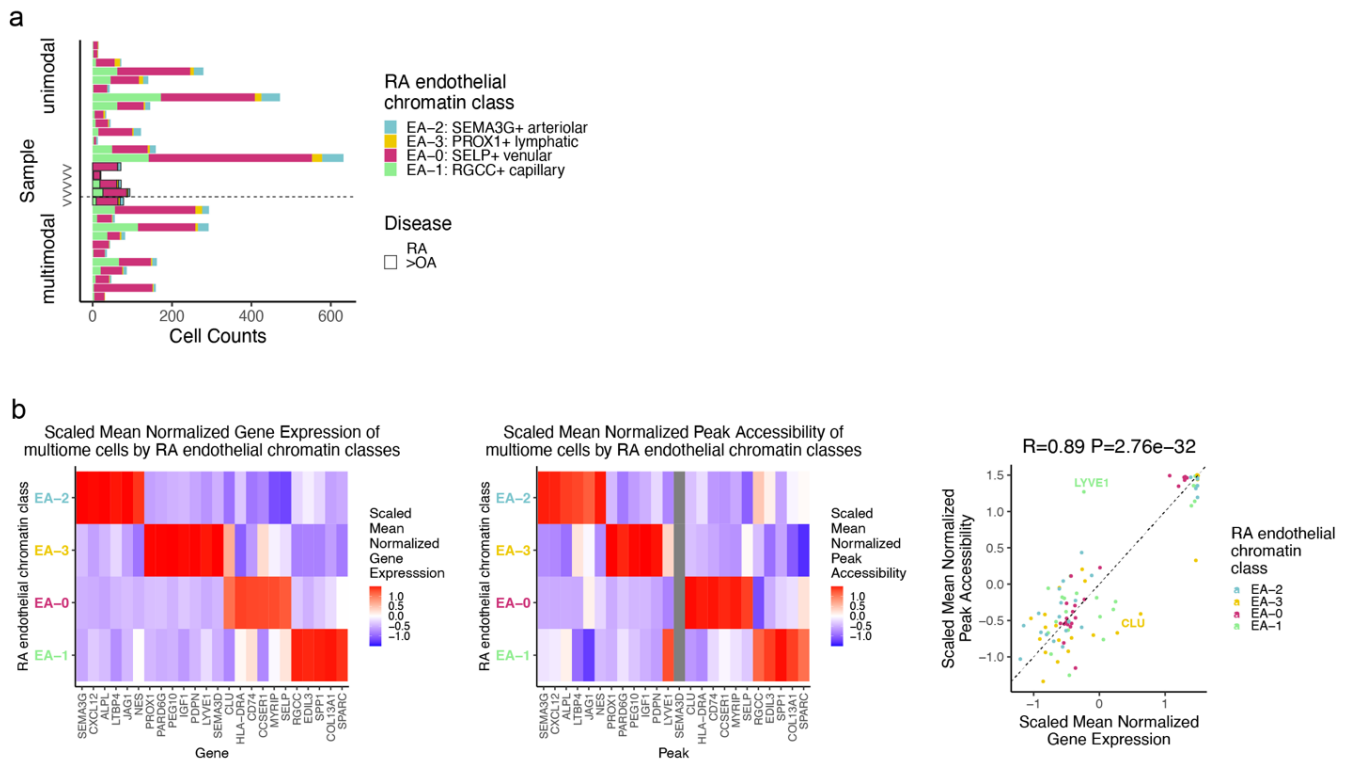

**Supplementary Fig. 7.** Further analyses of RA endothelial chromatin classes.

**a.** Endothelial chromatin class cell counts per sample for unimodal and multimodal datasets. OA samples are highlighted with a ‘>’ symbol and black bar outlines.

**b.** Scaled mean normalized marker gene expression (**left**) and peak accessibility (**middle**) across endothelial chromatin classes in multimodal datasets and the Pearson correlation (R) and two-sided p-value (P) between them (**right**). Genes without an overlapping promoter peak are colored in grey in the **middle** panel. On the **right**, correlation calculated from 92 gene/class combinations.

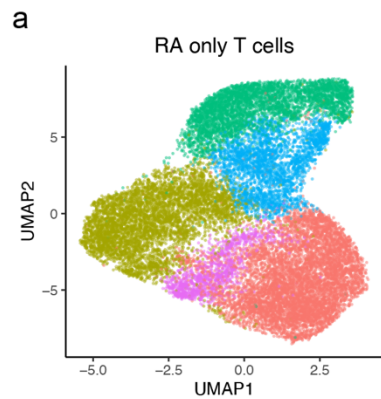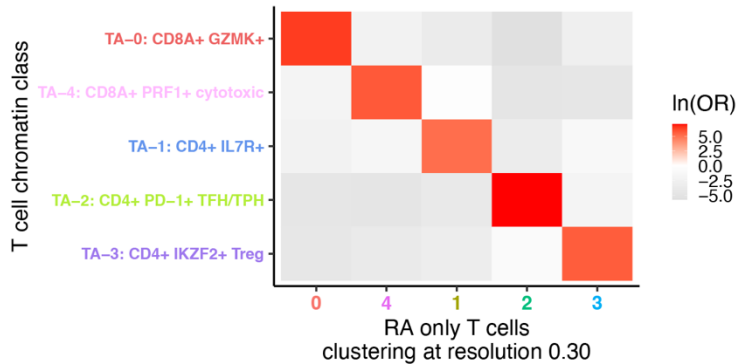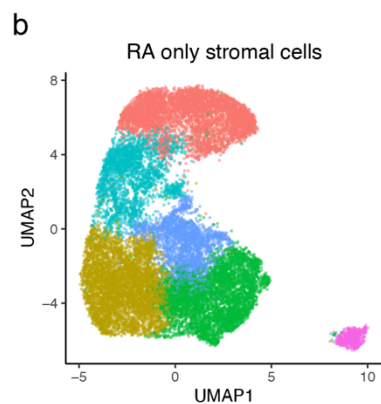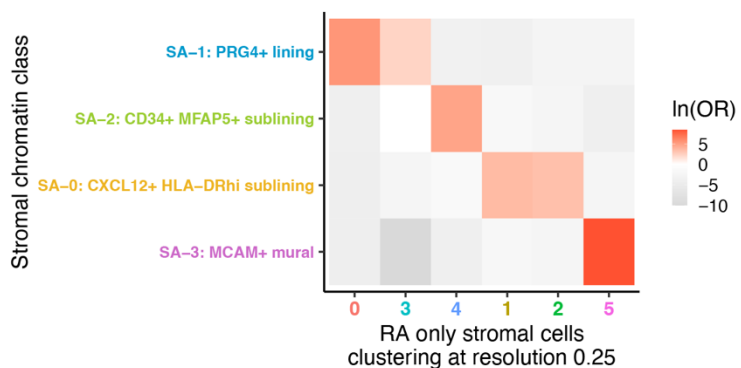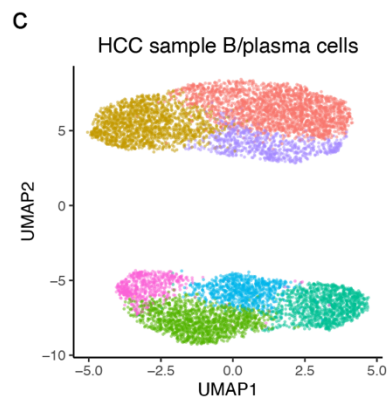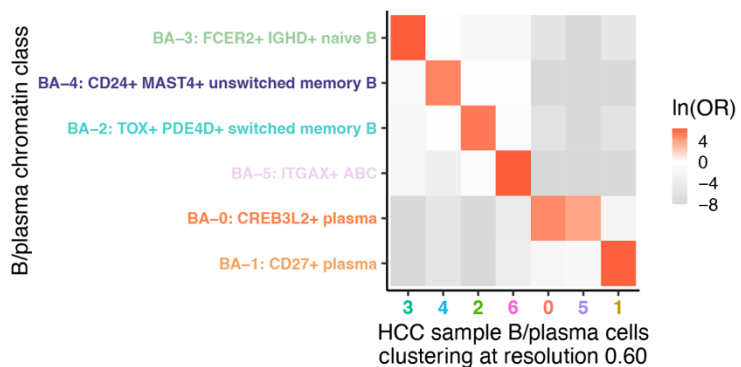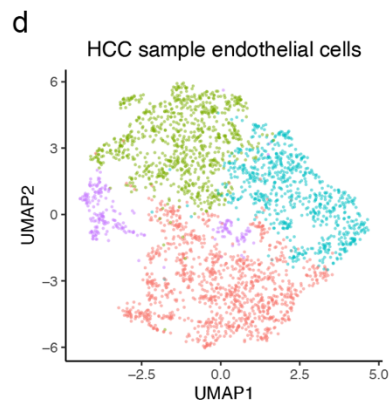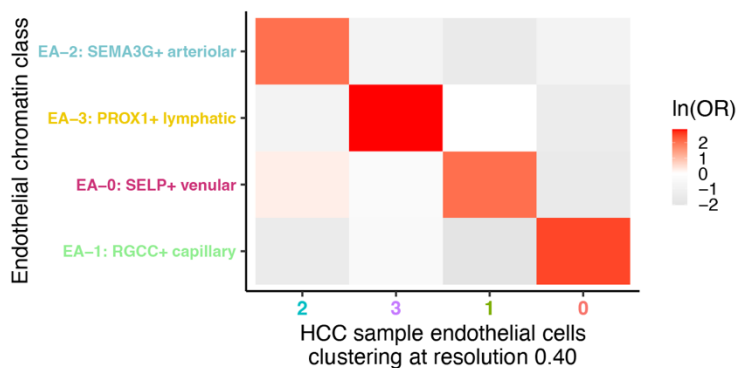

**Supplementary Fig. 8.** Chromatin classes are stable including or excluding OA and low-cell-count samples.

**a.** UMAP colored by T cell clusters defined from unimodal scATAC-seq and multimodal snATAC-seq T cells in RA samples only (**left**) and the natural log of the odds ratio between these clusters and the T cell chromatin classes defined in **Fig. 2 (right)**.

**b.** UMAP colored by stromal clusters defined from unimodal scATAC-seq and multimodal snATAC-seq stromal cells in RA samples only (**left**) and the natural log of the odds ratio between these clusters and the stromal chromatin classes defined in **Fig. 3 (right)**.

**c.** UMAP colored by B/plasma clusters defined from unimodal scATAC-seq and multimodal snATAC-seq B/plasma cells in high-cell-count (HCC) samples with at least 100 B/plasma cells (**left**) and the natural log of the odds ratio between these clusters and the B/plasma chromatin classes defined in **Fig. 5 (right)**.

**d.** UMAP colored by endothelial clusters defined from unimodal scATAC-seq and multimodal snATAC-seq endothelial cells in HCC samples with at least 100 endothelial cells (**left**) and the natural log of the odds ratio between these clusters and the endothelial chromatin classes defined in **Fig. 6 (right)**.

In all **right** panels, non-significant ( $FDR > 0.05$ ) OR values are white and the colors of the x-axis labels correspond to the colors in the UMAPs on the **left**.

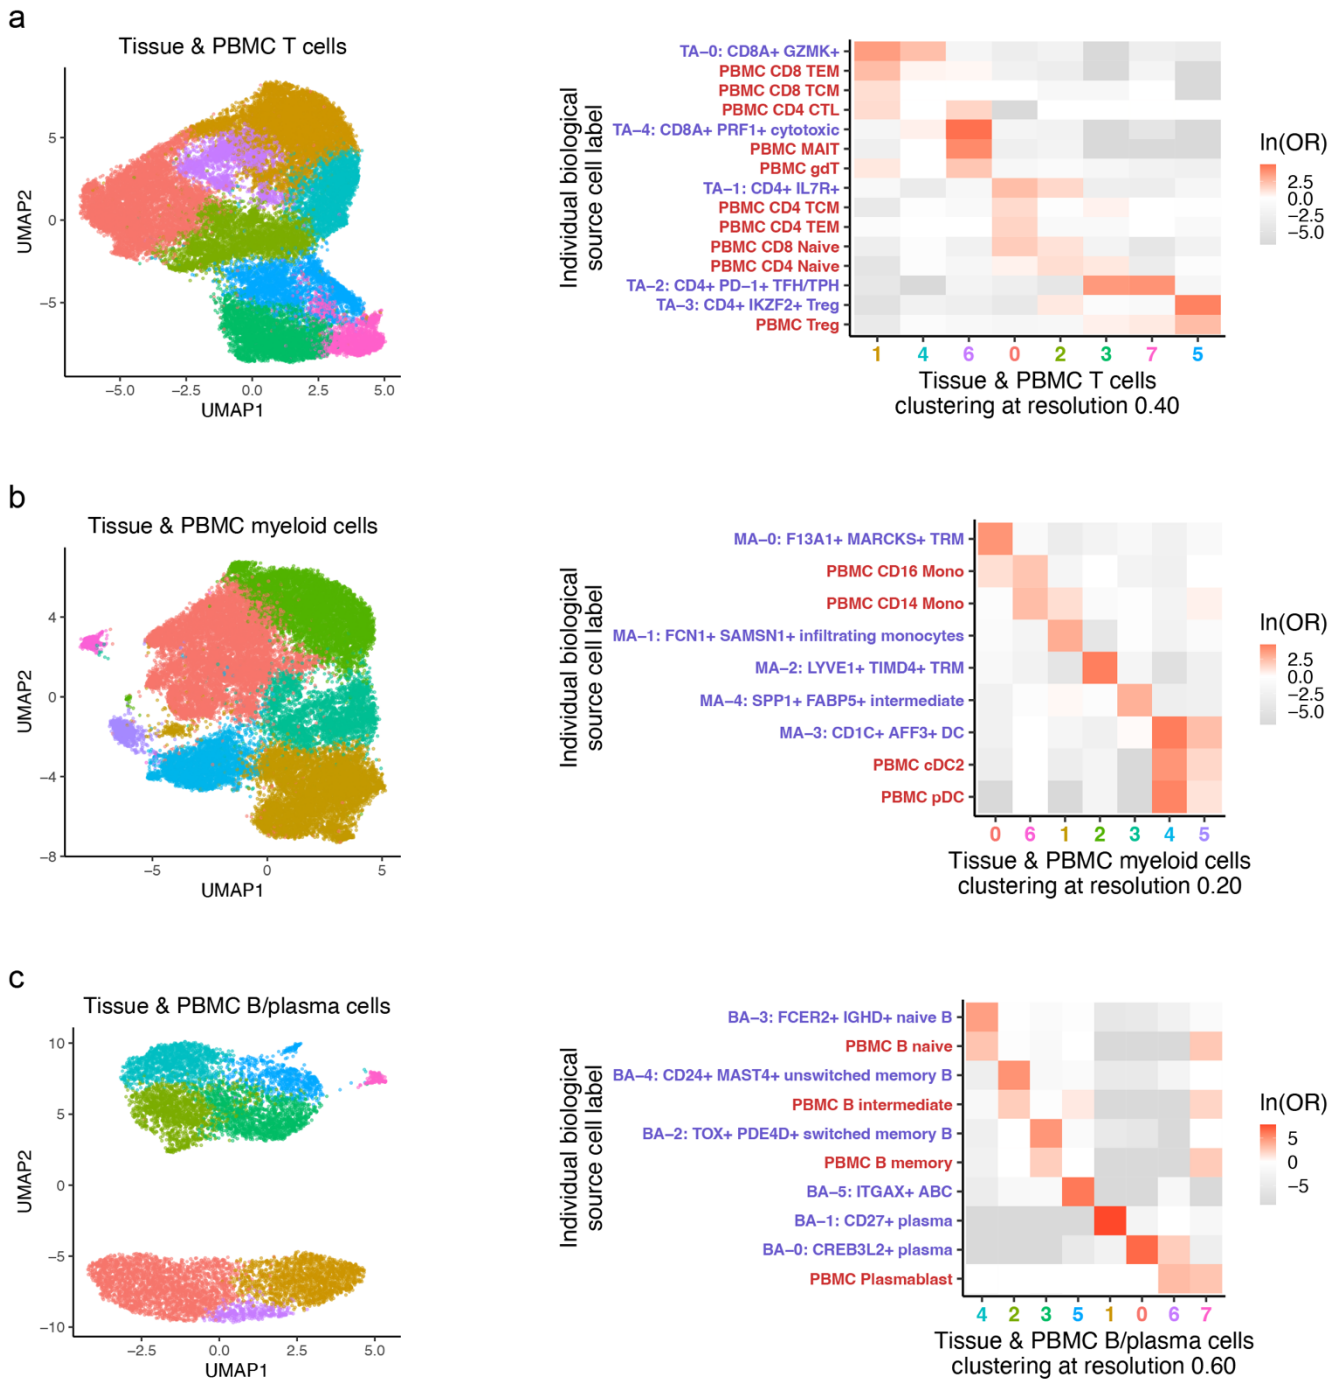

**Supplementary Fig. 9.** Tissue and PBMC analysis.

Clustering RA unimodal scATAC-seq, RA multimodal snATAC-seq, and healthy PBMC multimodal snATAC-seq together visualized on UMAP (**left**) and the natural log of the odds ratio between these clusters and the tissue/PBMC labels (**right**) for (**a.**) T, (**b.**) myeloid, and (**c.**) B/plasma cells. Non-significant ( $FDR > 0.05$ ) OR values are white. On the **right**, RA tissue chromatin classes are colored in purple and PBMC labels with more than 10 cells are colored in red; the colors of the x-axis labels correspond to the colors in the UMAPs on the **left**.

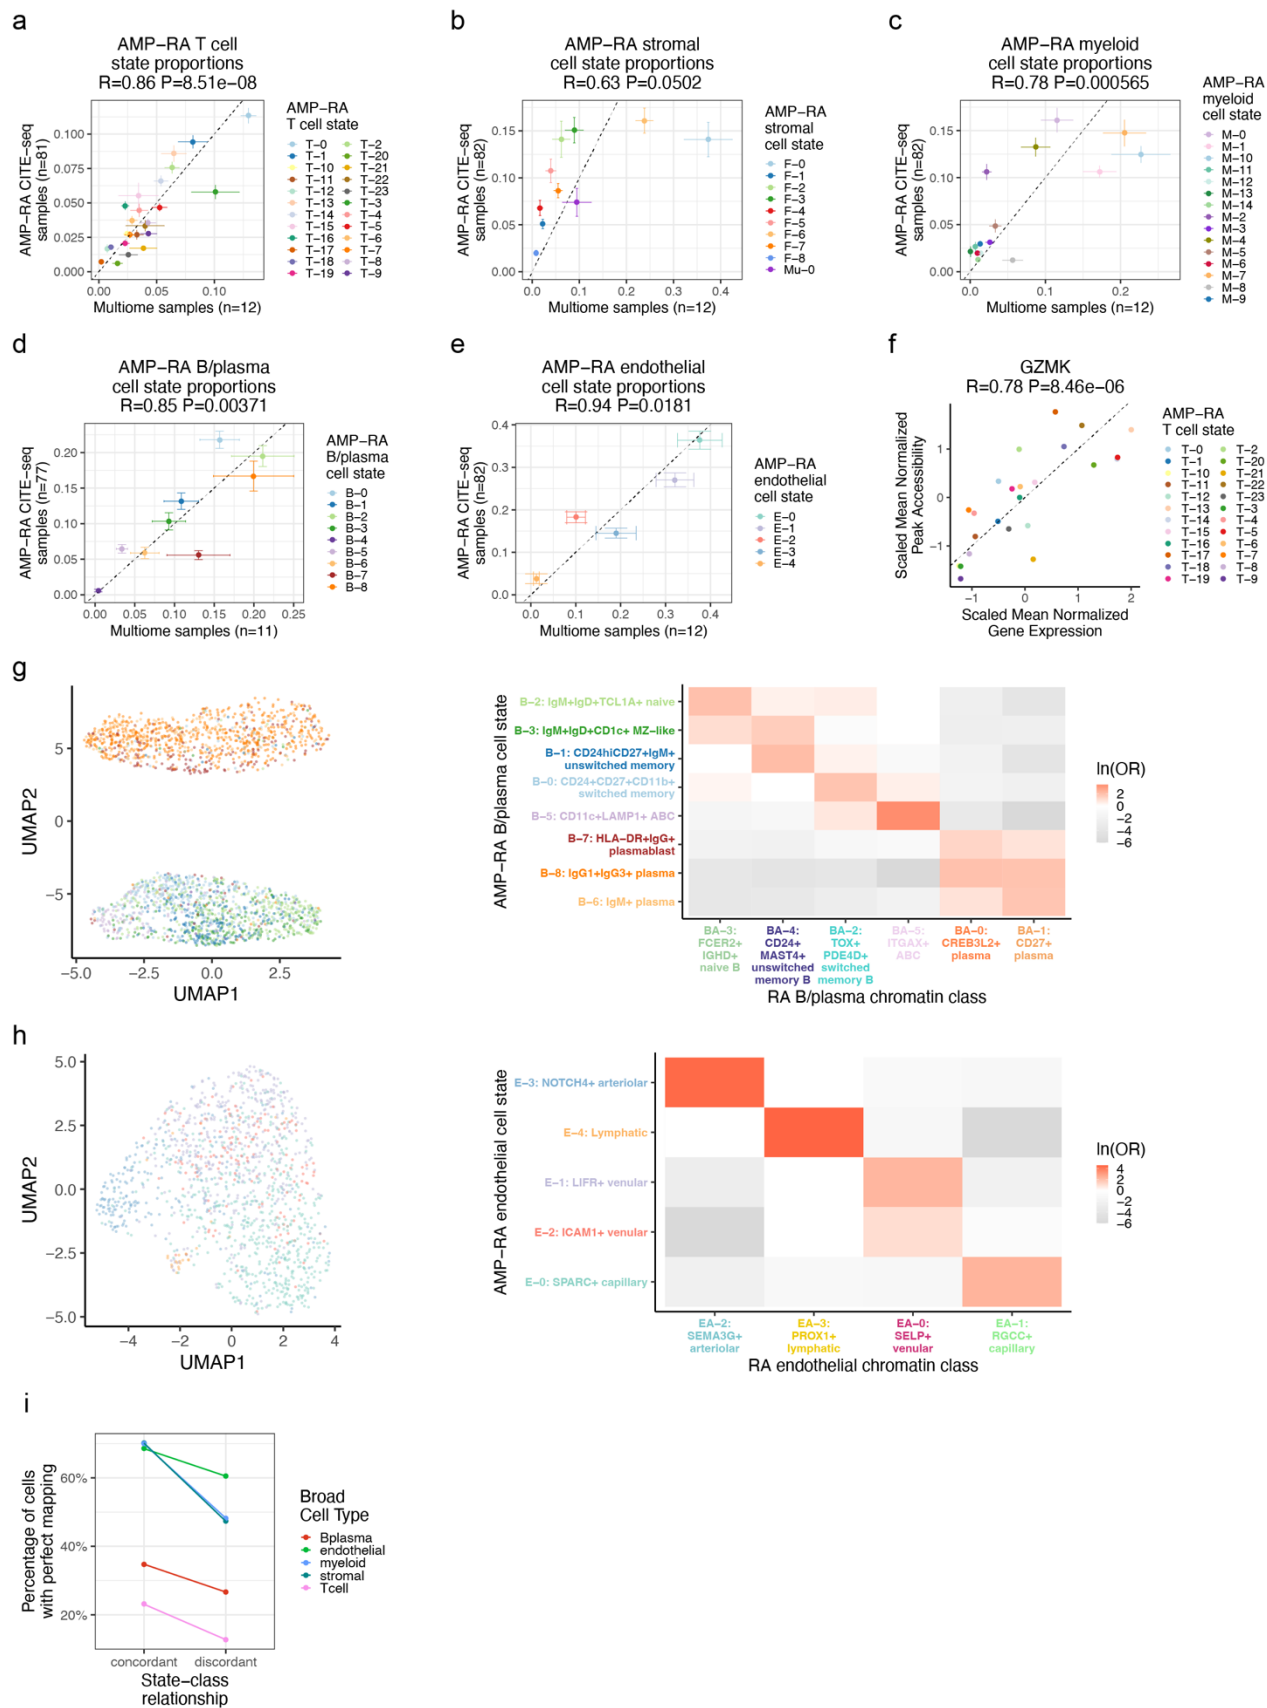

**Supplementary Fig. 10.** Mapping to transcriptional cell states within the chromatin class superstate model.

**a.-e.** AMP-RA reference transcriptional cell state proportions across CITE-seq<sup>14</sup> (y-axis) and multiome snRNA-seq (x-axis) samples for **(a.)** T (n=24), **(b.)** stromal (n=10), **(c.)** myeloid (n=15), **(d.)** B/plasma (n=9), and **(e.)** endothelial (n=5) cell states. These cell states were defined originally in the CITE-seq datasets and inferred in the multiome datasets using Symphony<sup>95</sup>. Error bars are standard errors of the means. Pearson correlation coefficients (R) and two-sided p-values (P) also noted.

**f.** Scaled mean normalized marker gene expression and peak accessibility for *GZMK* across AMP-RA reference transcriptional T cell states in multimodal datasets. Pearson correlation coefficient (R) and two-sided p-value (P) calculated on the 24 T cell states.

**g.-h.** For **(g.)** B/plasma and **(h.)** endothelial cells, chromatin class UMAP colored by the classified AMP-RA reference transcriptional cell states for multiome cells (**left**) and the natural log of the odds ratio between the chromatin classes and transcriptional cell states (**right**). On the **right**, non-significant values (FDR>0.05) are white, and the colors of the y-axis labels correspond to the colors in the UMAPs on the **left**. In **g.**, the B-4: AICDA+BCL6+ GC-like transcriptional cell state was excluded as fewer than 10 cells were classified into it.

**i.** For each cell type, the percentage of multiome cells with perfect mapping (*i.e.*, all 5 nearest neighbors in the reference had the same cell state) segregated by whether the cell's classified transcriptional cell state was in the corresponding chromatin class ('concordant') or not ('discordant'), as determined by the OR (**Fig. 7a-c, Supplementary Fig. 10g-h**).

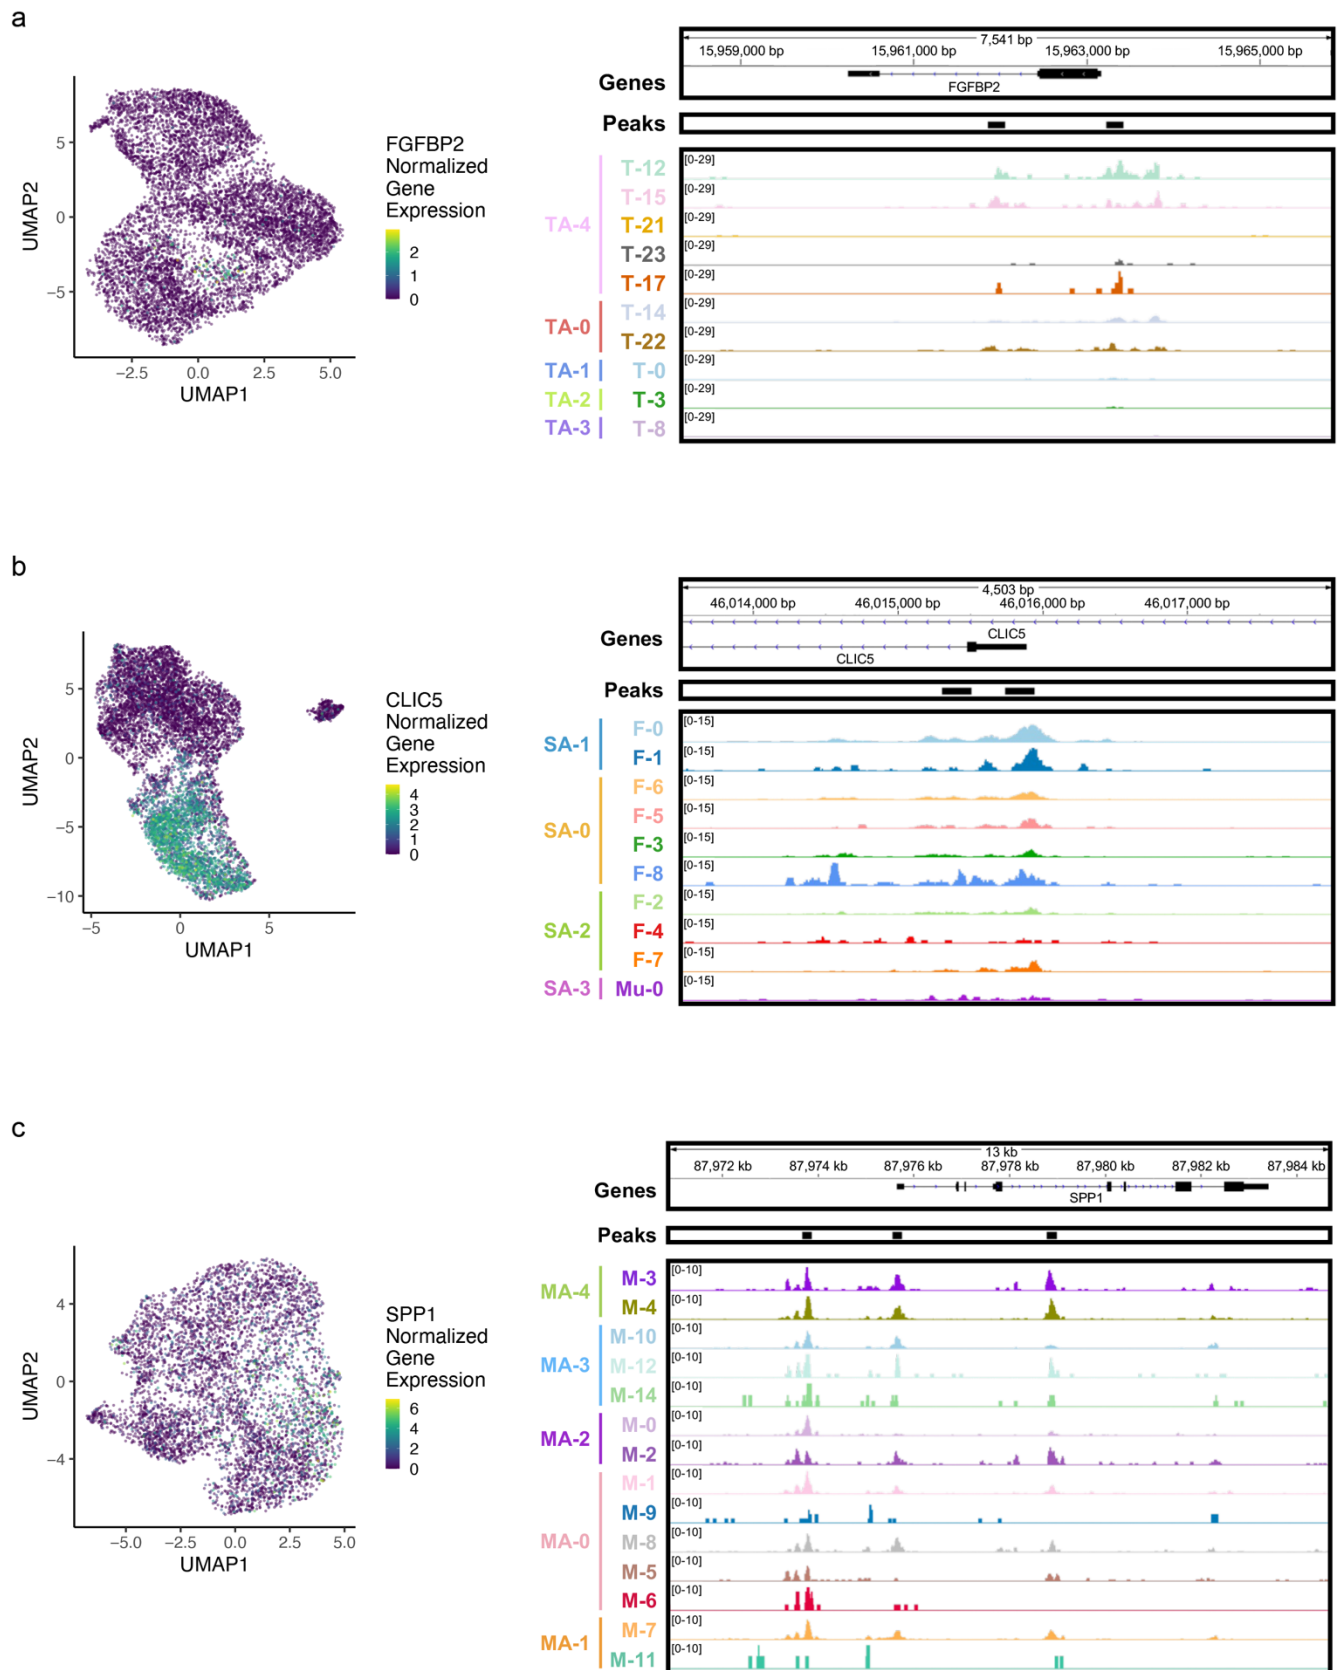

**Supplementary Fig. 11.** Open chromatin reads aggregated by transcriptional cell states and visualized at gene loci.



Chromatin class UMAP colored by normalized gene expression of multiome cells (**left**) and gene loci with selected gene isoforms, open chromatin peaks, and chromatin accessibility reads aggregated by transcriptional cell state and scaled by cell counts per state (**Methods**) (**right**) for (a.) *FGFBP2* (chr4:15,958,313-15,965,852) in T cells, (b.) *CLIC5* (chr6:46,013,500-46,018,000) in stromal cells, and (c.) *SPP1* (chr4:87,970,884-87,984,690) in myeloid cells. The associated chromatin classes were also listed, though not all states therein were shown. In c., M-13: pDC was excluded in myeloid cells since less than 10 multiome cells were classified as such.

a

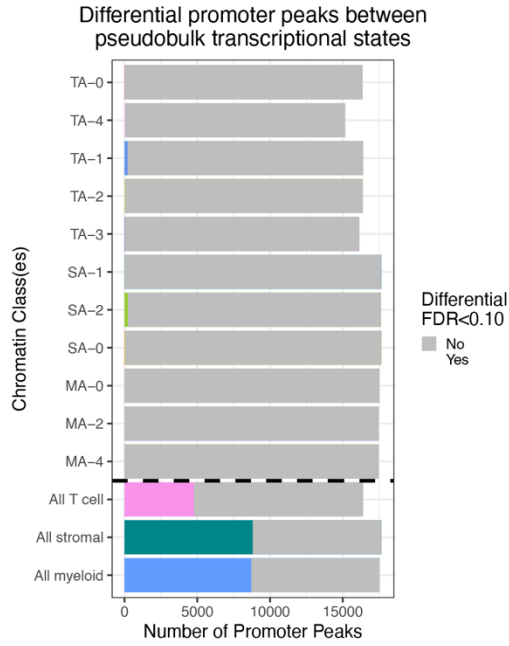

b

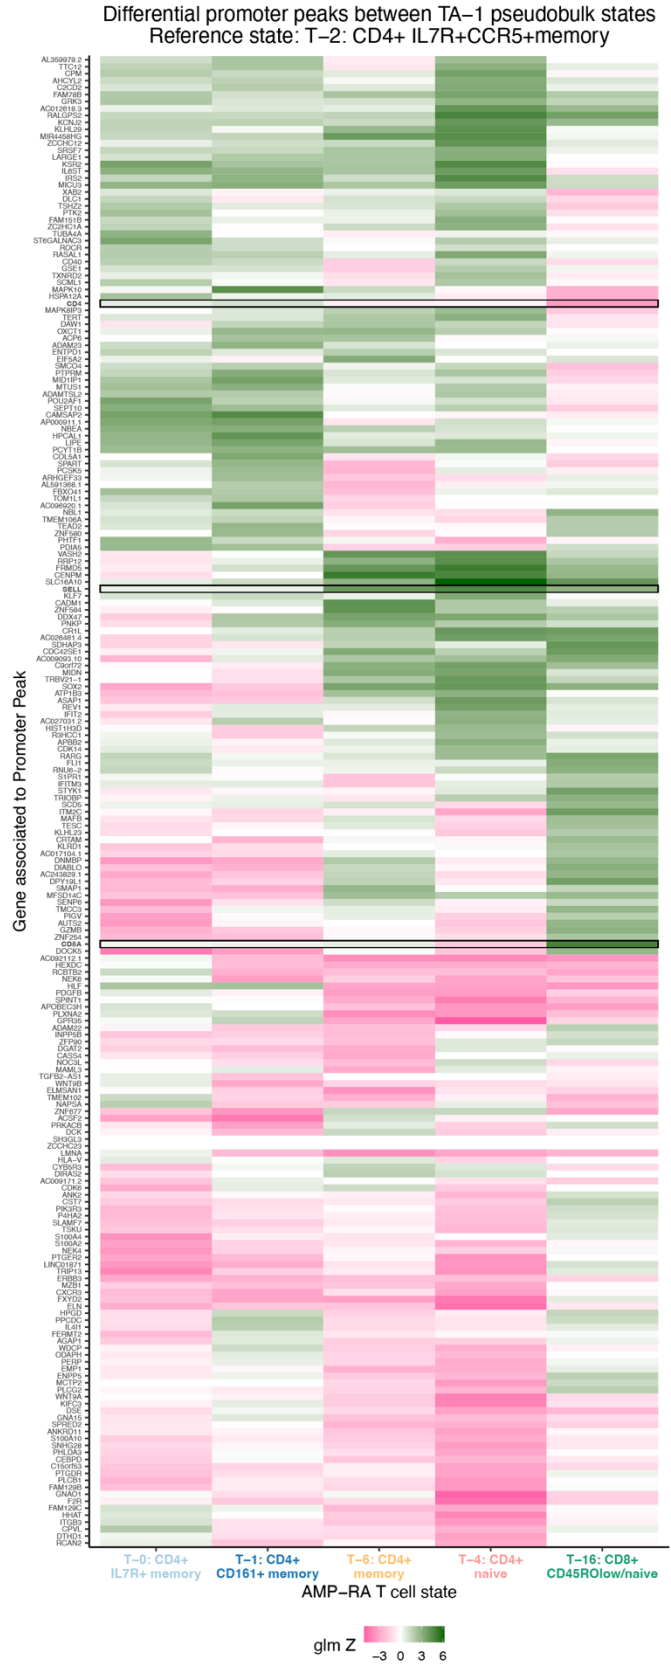

**Supplementary Fig. 12.** Differential promoter peaks between pseudobulks by sample and transcriptional cell states within or across chromatin classes.

a. The number of differential promoter peaks between pseudobulked transcriptional cell states within or across classes, as determined by an ANOVA LRT  $FDR < 0.10$  between two negative binomial models (**Methods**), colored by class or cell type; peaks with  $FDR \geq 0.10$  are colored in gray. A dashed line separates the within and across class analyses. Pseudobulks were calculated by summing the non-binary peaks x cells matrix by sample and transcriptional cell state combinations across cells.

b. For the  $T_A-1$ : CD4+ IL7R+ chromatin class, the glm Z-score of the pseudobulked transcriptional cell state beta for each differential peak, labeled by the gene associated with that promoter (**Methods**). T-2: CD4+ IL7R+ CCR5+ memory was used as the reference cell type in the negative binomial model. We highlighted promoter peaks associated to *CD4*, *CD8A*, and *SELL* with bolded gene names and a black box outline.

**a**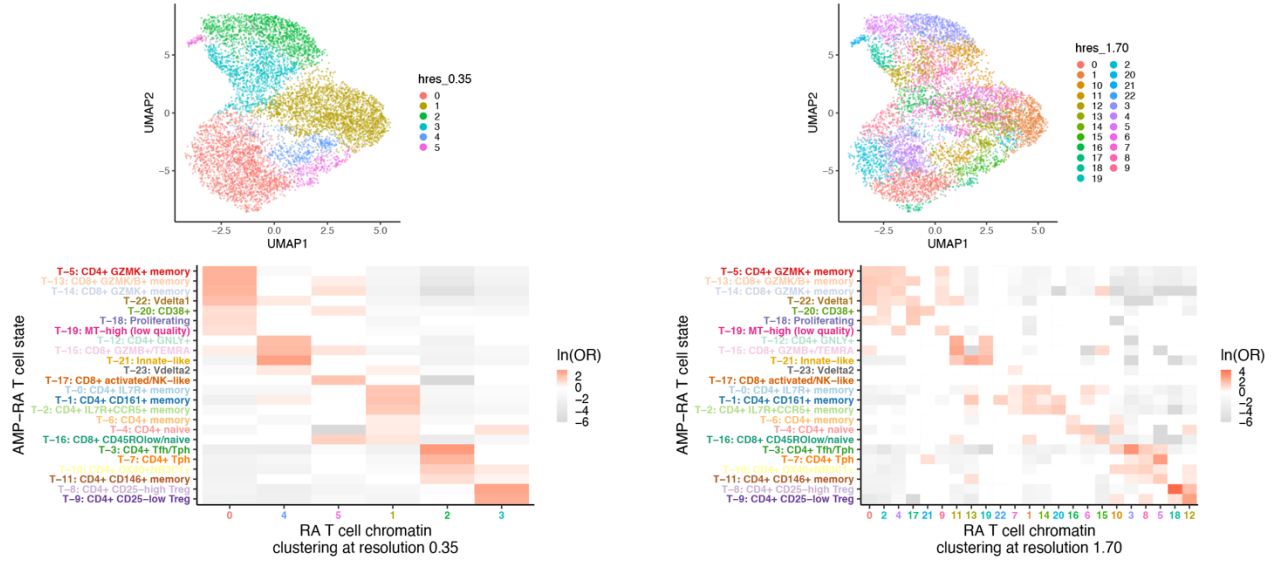**b**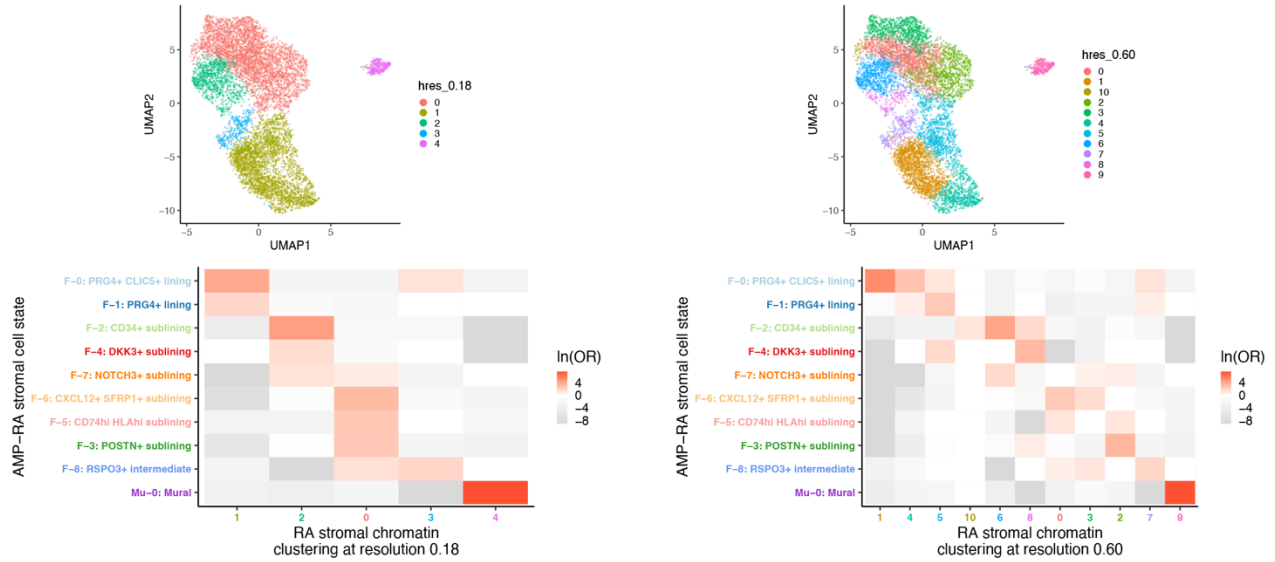**c**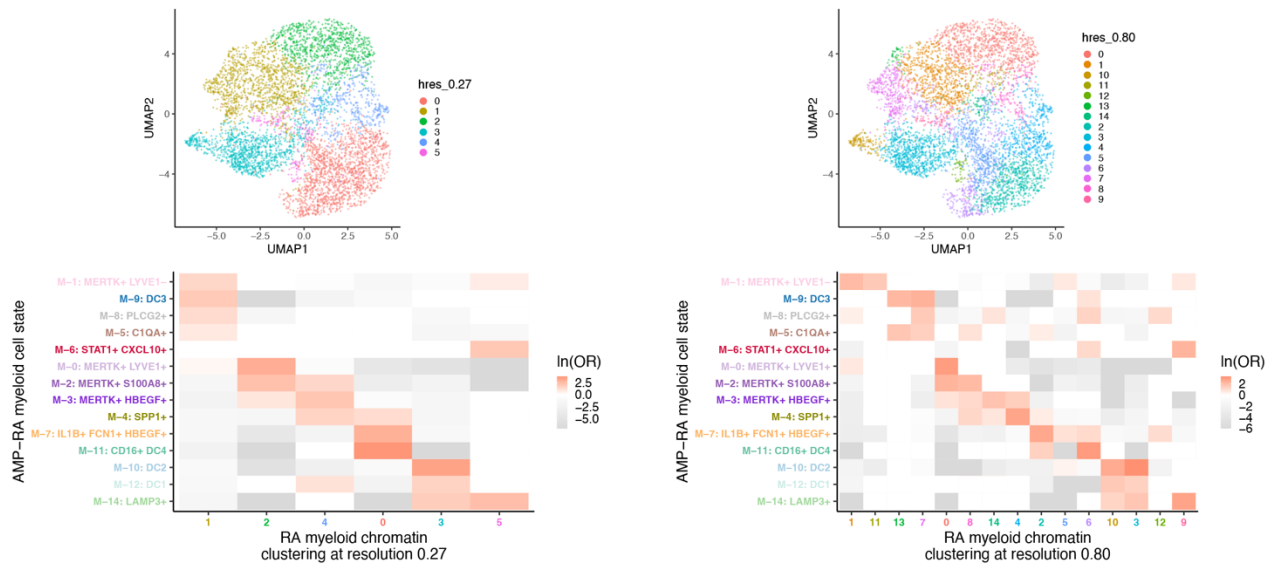

**Supplementary Fig. 13.** Additional chromatin clustering resolutions.

Chromatin class UMAP colored by chromatin clusters (**top**) and the natural log of the odds ratio between the chromatin clusters and transcriptional cell states (**bottom**) at clustering resolutions that add 1 additional cluster (**left**) and roughly the same number of clusters as states (**right**) for (a.) T, (b.) stromal, and (c.) myeloid cell types. In all **bottom** panels, non-significant ( $FDR > 0.05$ ) OR values are white and the colors of the x-axis labels correspond to the colors in the UMAPs on the **top**.

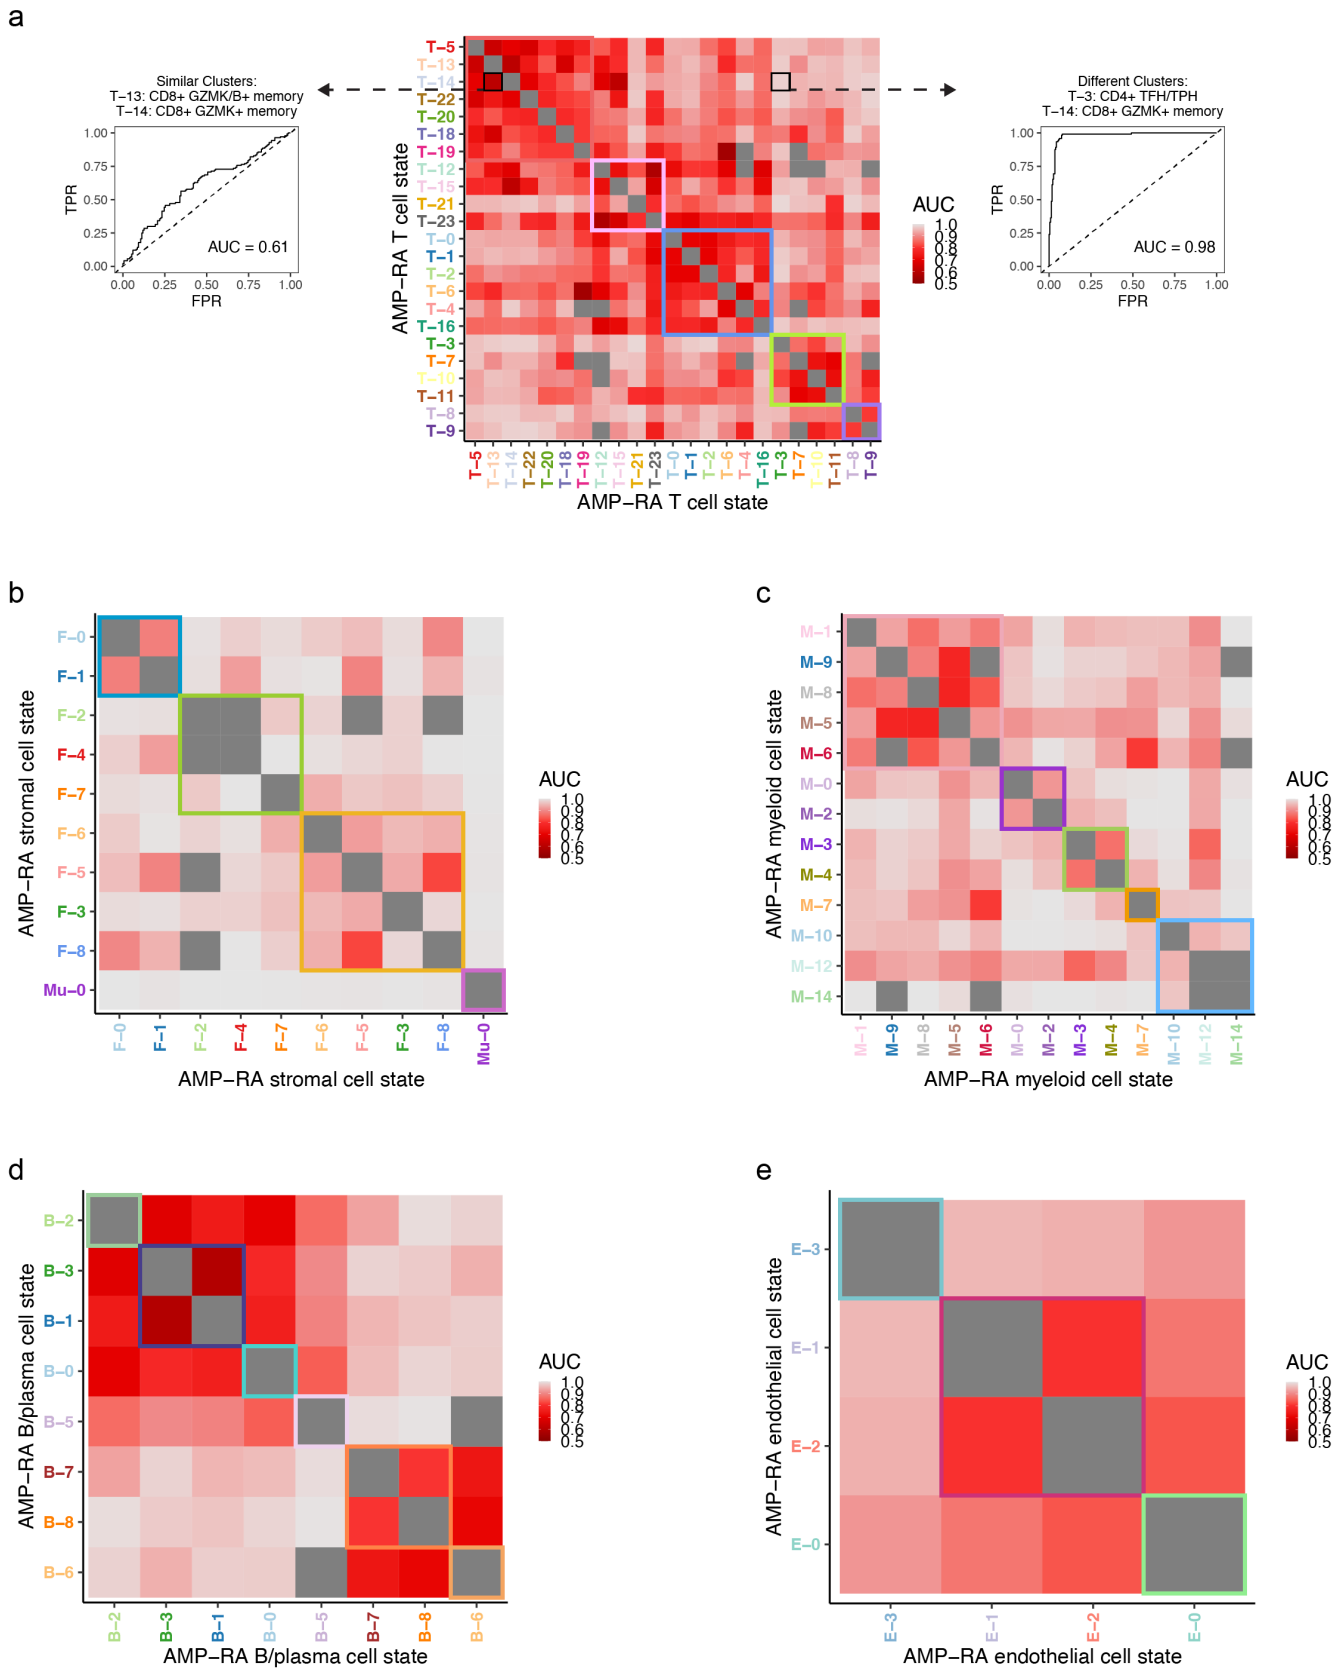

**Supplementary Fig. 14.** Linear Discriminant Analysis (LDA) model predicted pairwise transcriptional cell state from continuous chromatin principal components (PCs).

**a.** Linear Discriminant Analysis (LDA) model predicted the transcriptional cell state for each pair of T cell states from the batch-corrected chromatin principal components (PCs) (**Methods**). Area under the curve (AUC) values shown for an example of similar states (**left**) and different states (**right**) with all pairs of states with more than 50 cells shown in the **middle**. Upper and lower triangles are mirrored; the LDA analysis was run only once per pair of states. The grey non-diagonal values depict pairs of states that had a constant variable in the model due to samples with too few cells for that pair. The superimposed colored boxes reflect chromatin class superstates defined in **Fig. 7a-c** and **Supplementary Fig. 10g-h**.

**b.-e.** Middle panel of (**a.**) for (**b.**) stromal, (**c.**) myeloid, (**d.**) B/plasma, and (**e.**) endothelial cell types.

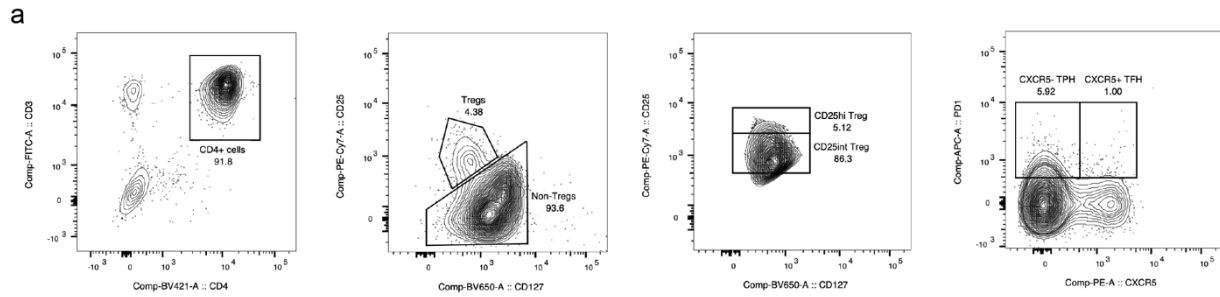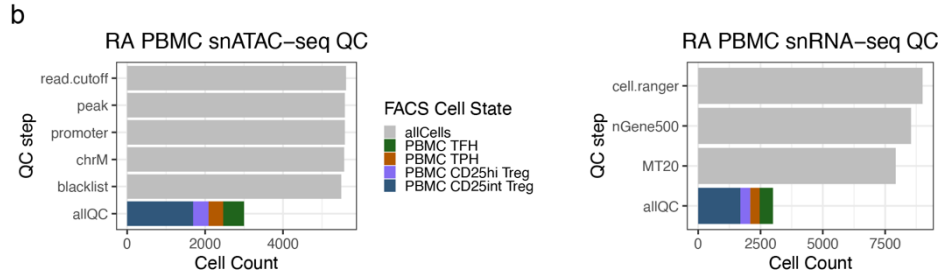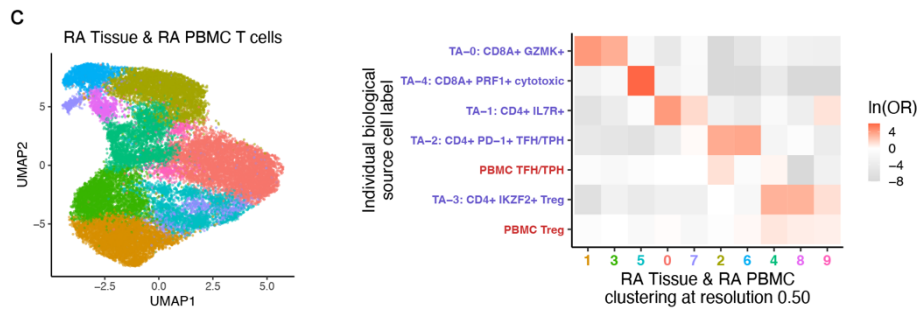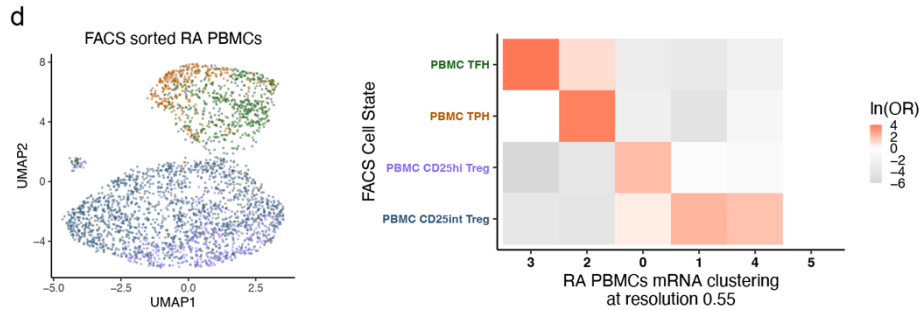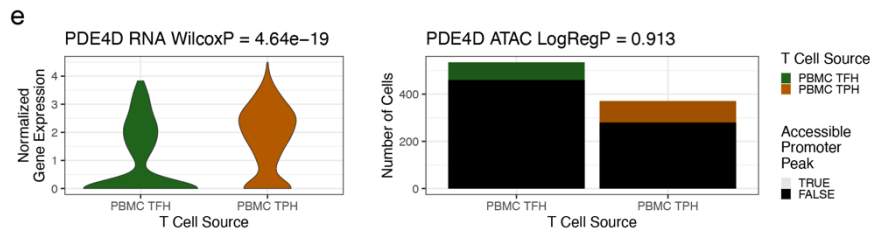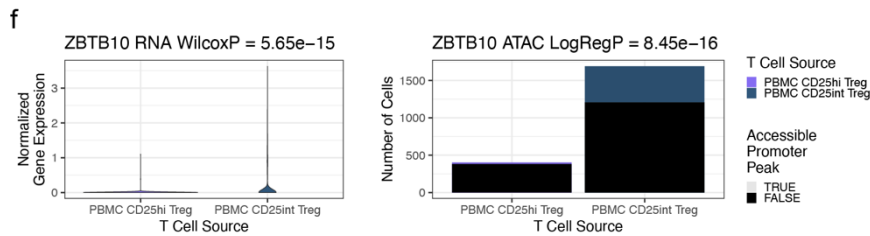

**Supplementary Fig. 15.** Multiome experimental support for the hypothesized superstate model using RA PBMCs sorted for Treg, TFH, TPH populations via FACS.



- a. FACS plots of pooled PBMCs from 4 RA patients sorted for: CD4<sup>+</sup>CD127<sup>-</sup>CD25<sup>hi</sup> Treg, CD4<sup>+</sup>CD127<sup>-</sup>CD25<sup>int</sup> Treg, CD4<sup>+</sup>CD25<sup>-</sup>PD1<sup>+</sup>CXCR5<sup>+</sup> TFH, and CD4<sup>+</sup>CD25<sup>-</sup>PD1<sup>+</sup>CXCR5<sup>-</sup> TPH.
- b. Quality control steps ending in the final cell counts for the FACS cell state hashtags in snATAC-seq (**left**) and snRNA-seq (**right**). allQC refers to cells passing ATAC, RNA, and HTO quality control measures (**Methods**).
- c. Clustering RA tissue unimodal scATAC-seq, RA tissue multimodal snATAC-seq, and sorted RA PBMC multimodal snATAC-seq cells together visualized on UMAP (**left**) and the natural log of the odds ratio between these clusters and the RA tissue/RA PBMC labels (**right**). Non-significant (FDR>0.05) OR values are white. The colors of the x-axis labels on the **right** correspond to the colors in the UMAPs on the **left**. On the **right** y-axis, RA tissue chromatin classes are colored in purple and RA PBMC FACS cell states are colored in red.
- d. RA PBMC multimodal snRNA-seq cells visualized on UMAP (**left**) and the natural log of the odds ratio between the snRNA-seq clusters and the RA PBMC FACS cell states (**right**). Non-significant (FDR>0.05) OR values are white. The colors of the y-axis labels on the **right** correspond to the RA PBMC FACS cell states in the UMAPs on the **left**.
- e.-f. Normalized gene expression (**left**) and proportion of cells with or without chromatin accessibility in the promoter peak (**right**) for (e.) *PDE4D*, segregated by RA PBMC TFH and TPH populations and (f.) *ZBTB10*, segregated by RA PBMC CD25<sup>hi</sup> and CD25<sup>int</sup> Treg populations. Nominal two-sided Wilcoxon (**left**) and logistic regression LRT (**right**) P-values above (**Methods**).

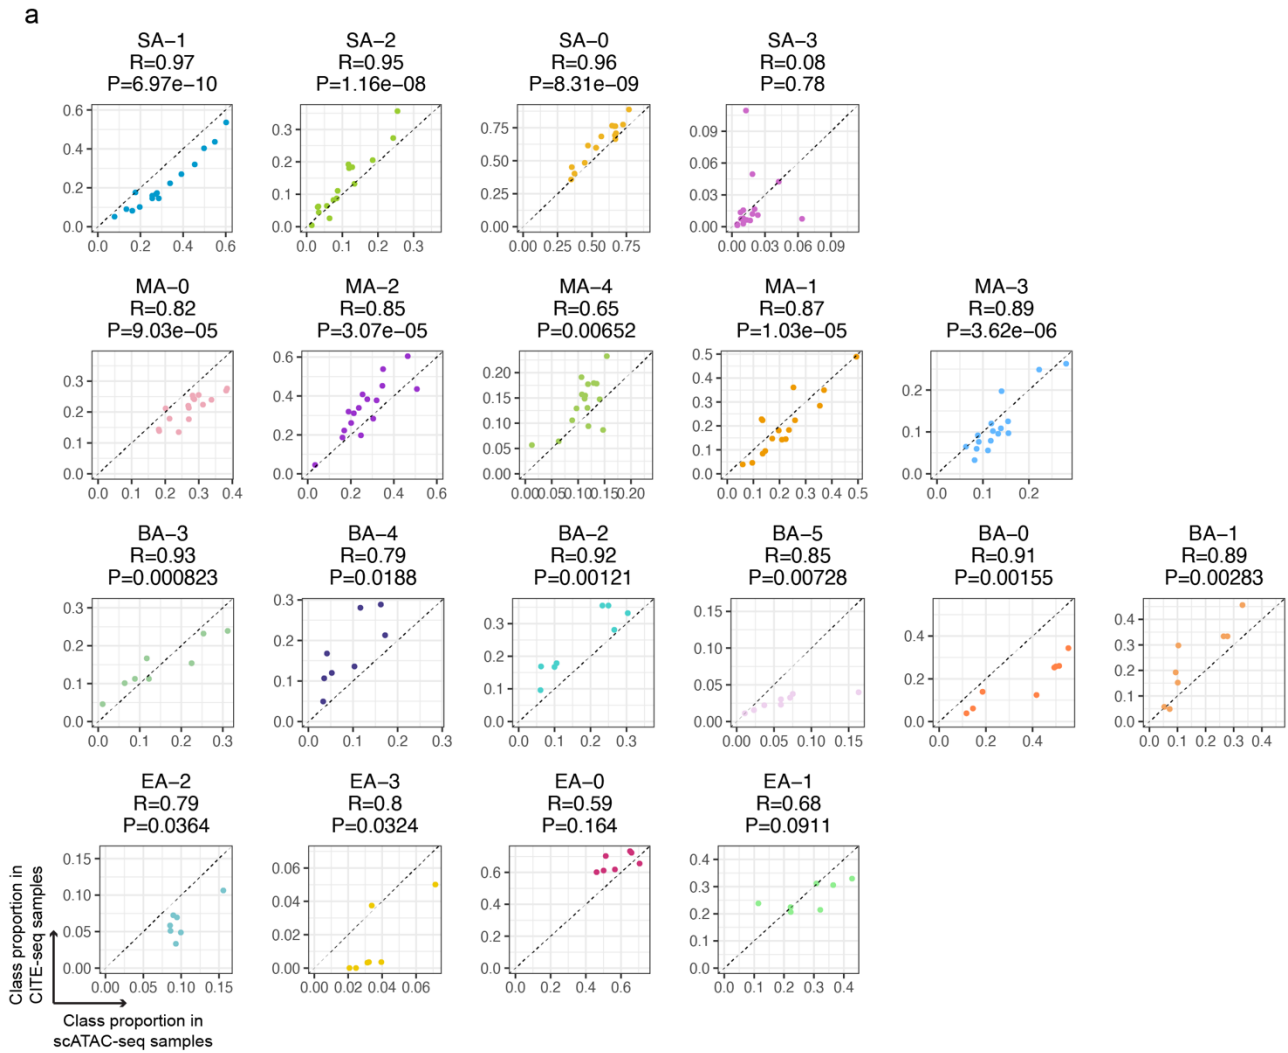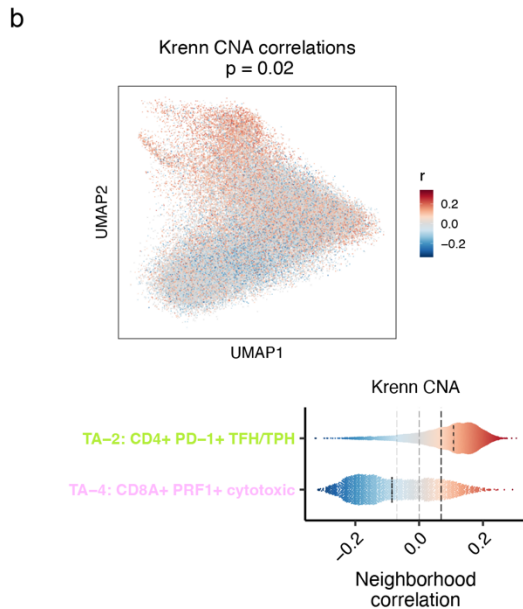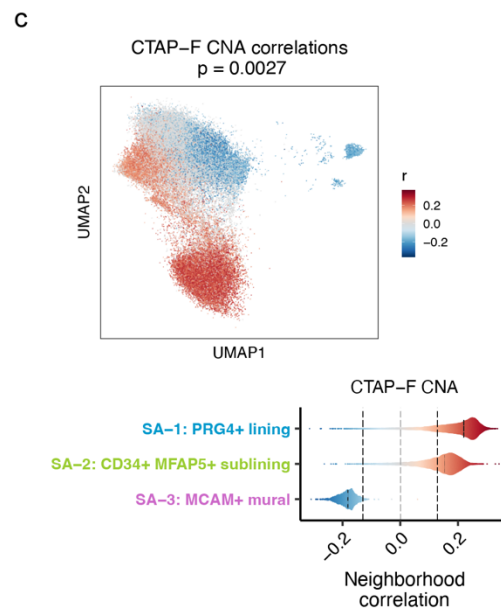

**Supplementary Fig. 16.** Additional RA CNA correlations.

**a.** For each donor shared between the unimodal scATAC-seq and AMP-RA reference studies with at

least 200 cells for that cell type (or 100 cells for endothelial cells), the Pearson correlation (R) and two-sided p-value (P) between the relative proportions of chromatin classes defined in the unimodal scATAC-seq datasets (x-axis) and classified into in the CITE-seq datasets<sup>14</sup> through the multiome cells (y-axis). Number of donors: 16 in stromal, 16 in myeloid, 8 in B/plasma, 7 in endothelial.

**b.** CNA correlations between T cell neighborhoods and Krenn inflammation score in AMP-RA reference T cells visualized on chromatin class UMAP (**top**; two-sided global P=0.02) and aggregated by classified T cell chromatin classes (**bottom**). On the **top**, cells not passing the FDR threshold were colored grey. On the **bottom**, FDR thresholds shown in dotted black lines.

**c.** CNA correlations between stromal cell neighborhoods and CTAP-F in AMP-RA reference stromal cells visualized on chromatin class UMAP (**top**; two-sided global P=0.0027) and aggregated by classified stromal chromatin classes (**bottom**). On the **top**, cells not passing the FDR threshold were colored grey. On the **bottom**, FDR thresholds shown in dotted black lines.

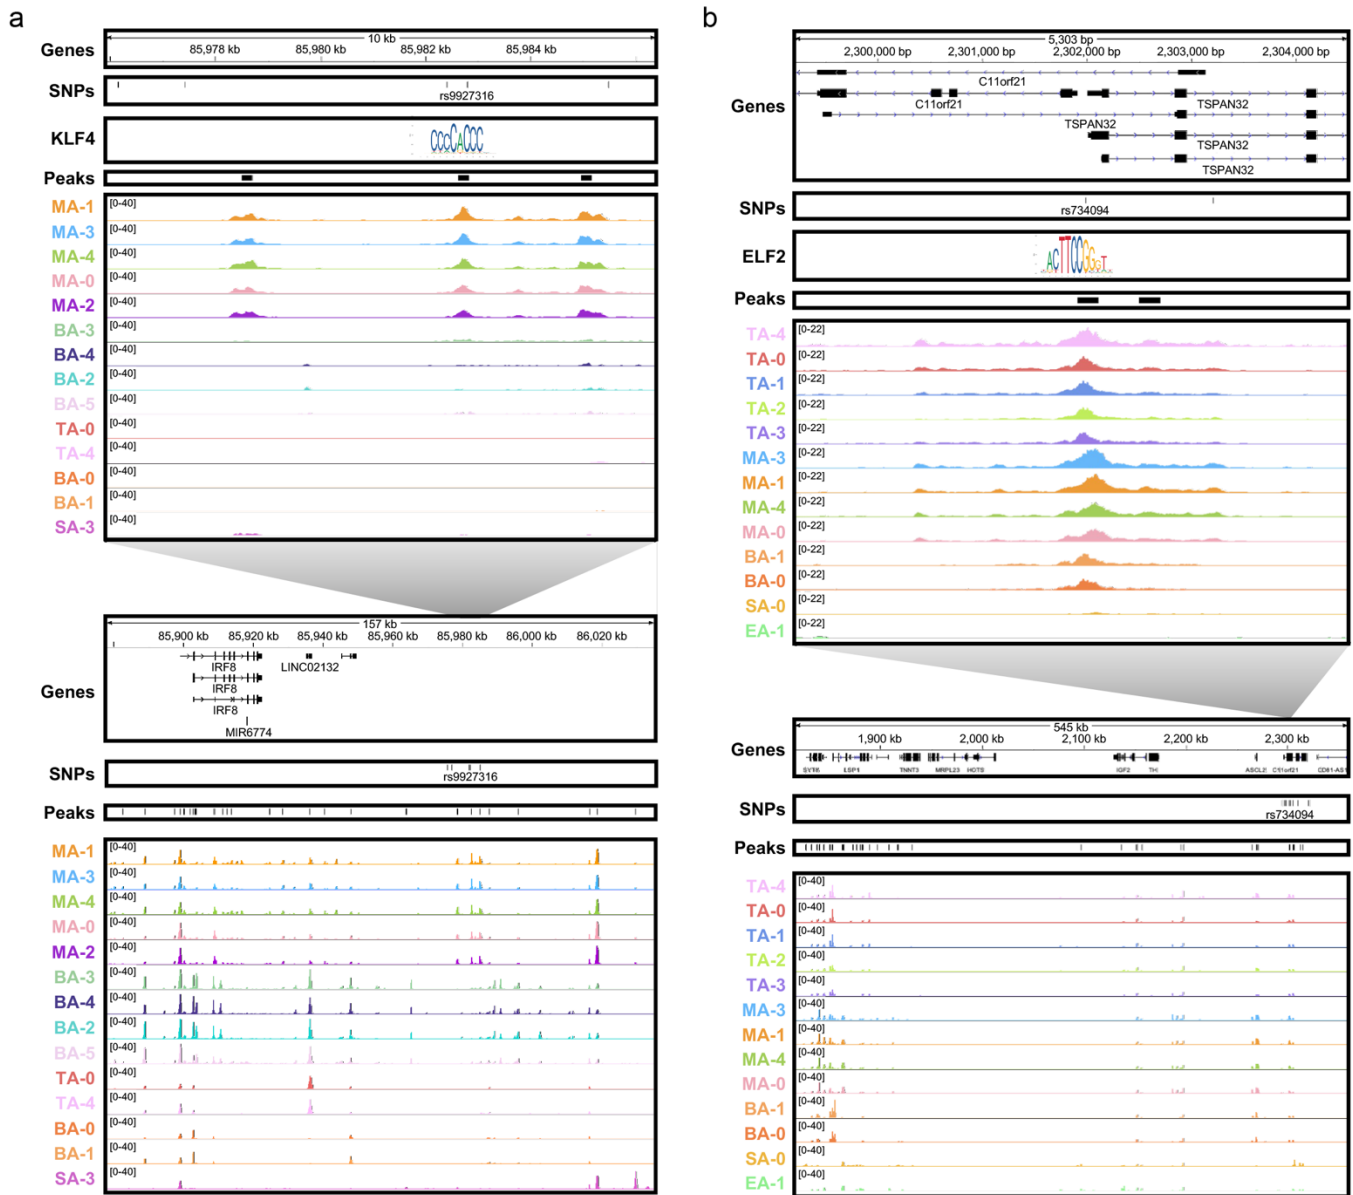

**Supplementary Fig. 17.** Chromatin accessibility of additional RA risk variants aggregated by chromatin classes and visualized at gene loci.

**a.** rs9927316 locus, zoomed in (chr16:85,975,899-85,986,400) (**top**) and zoomed out (chr16:85,877,695-86,035,055) (**bottom**) with gene isoforms, SNPs, open chromatin peaks, and chromatin accessibility reads aggregated by chromatin class and scaled by read counts per class (**Methods**). KLF4 motif was downloaded from JASPAR<sup>109</sup> ID MA0039.4 and is not to scale, but it is aligned to the SNP-breaking motif position.

**b.** rs734094, zoomed in (chr11:2,299,199-2,304,500) (**top**) and zoomed out (chr11:1,815,000-2,360,000) (**bottom**) with gene isoforms, SNPs, open chromatin peaks, and chromatin accessibility reads aggregated by chromatin class and scaled by read counts per class (**Methods**). ELF2 motif was downloaded from JASPAR<sup>109</sup> ID MA1483.1 and is not to scale, but it is aligned to the SNP-breaking motif position.

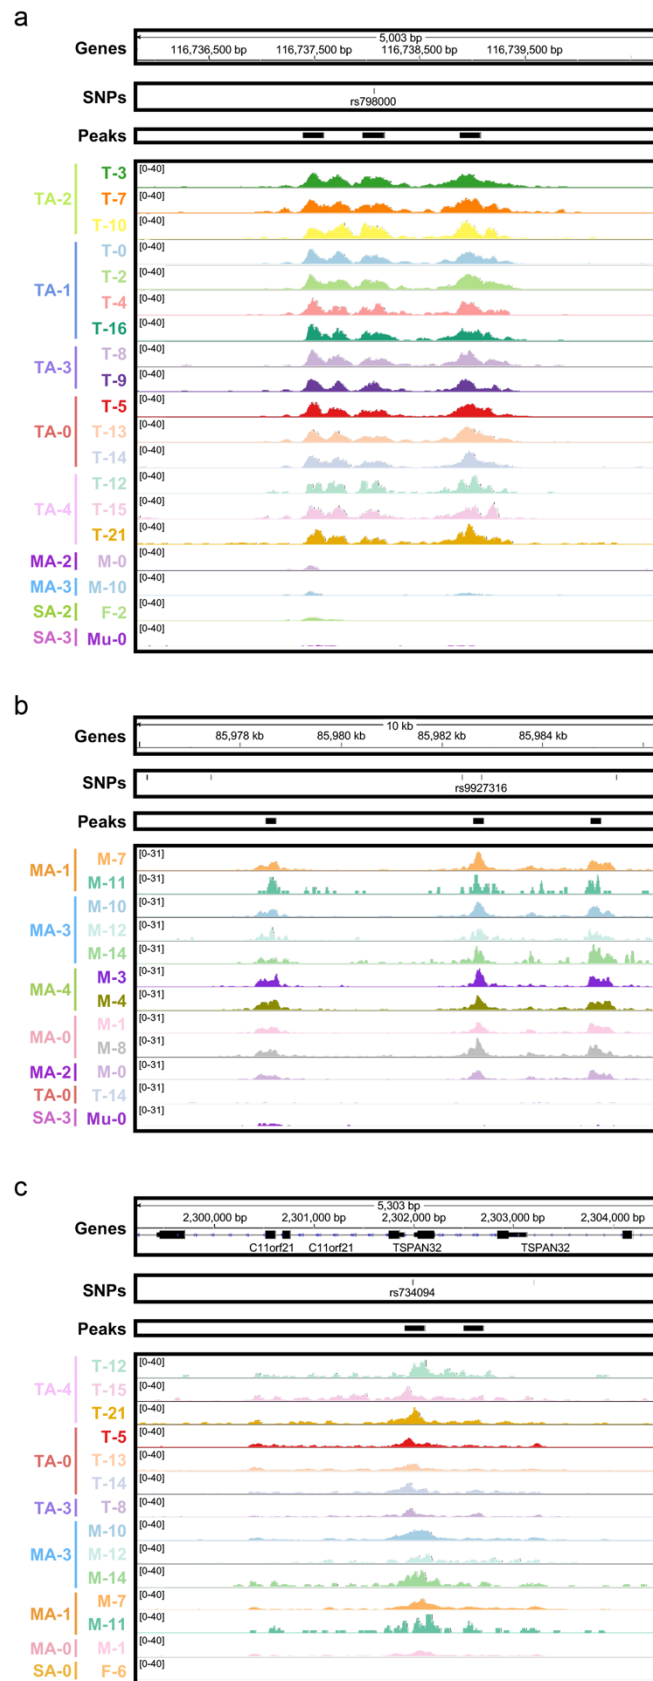

**Supplementary Fig. 18.** Chromatin accessibility of putative RA risk variants aggregated by transcriptional cell states and visualized at gene loci.

Gene isoforms, SNPs, open chromatin peaks, and chromatin accessibility reads from multiome cells aggregated by transcriptional cell state and scaled by read counts per state (**Methods**) for (a.) rs798000 locus (chr1:116,735,799-116,740,800), (b.) rs9927316 locus (chr16:85,975,899-85,986,400), and (c.) rs734094 locus (chr11:2,299,199-2,304,500). The associated chromatin classes were also listed, though not all states therein were shown.

**Supplementary Table 1.** Tissue datasets used in this study. BWH: Brigham and Women’s Hospital, Boston, MA. HSS: Hospital for Special Surgery Research Institute, New York, NY

| Experiment Type | Number of samples | Average Age (years) | Number of Females | Number of CCP positive | Number of CCP negative | RA | OA | Sites          | ATAC | RNA | Surface Protein |
|-----------------|-------------------|---------------------|-------------------|------------------------|------------------------|----|----|----------------|------|-----|-----------------|
| scATAC-seq      | 18                | 65                  | 17                | 13                     | 1                      | 14 | 4  | 7 AMP-RA sites | X    |     |                 |
| Multiome        | 12                | 60                  | 10                | 5                      | 4                      | 11 | 1  | BWH & HSS      | X    | X   |                 |
| CITE-seq        | 82                | 57                  | 59                | 54                     | 13                     | 73 | 9  | 7 AMP-RA sites |      | X   | X               |

**Supplementary Table 2.** Mean quality control metrics for ATAC cells segregated by ATAC assay and cell type. See ATAC cell QC **Methods** section for more information.

| ATAC Assay | Cell Type   | Pre-duplication read counts | Deduplicated read counts | Peak neighborhood read counts | Promoter read counts | Mitochondrial read counts | Blacklisted region read counts |
|------------|-------------|-----------------------------|--------------------------|-------------------------------|----------------------|---------------------------|--------------------------------|
| unimodal   | Bplasma     | 38,620                      | 24,476                   | 18,741                        | 8,131                | 829                       | 1,533                          |
| unimodal   | endothelial | 51,628                      | 31,231                   | 21,040                        | 8,326                | 1,481                     | 1,775                          |
| unimodal   | myeloid     | 38,241                      | 25,243                   | 19,533                        | 6,927                | 345                       | 1,079                          |
| unimodal   | NK          | 41,180                      | 26,042                   | 21,002                        | 9,194                | 576                       | 1,249                          |
| unimodal   | stromal     | 48,412                      | 30,396                   | 20,299                        | 6,943                | 746                       | 1,843                          |
| unimodal   | Tcell       | 40,580                      | 25,079                   | 19,955                        | 8,932                | 824                       | 1,401                          |
| multimodal | Bplasma     | 124,867                     | 46,437                   | 36,592                        | 15,939               | 1,336                     | 5,021                          |
| multimodal | endothelial | 109,231                     | 45,591                   | 31,673                        | 12,514               | 1,465                     | 4,085                          |
| multimodal | myeloid     | 139,873                     | 58,182                   | 44,318                        | 15,461               | 1,026                     | 4,085                          |
| multimodal | NK          | 137,460                     | 48,150                   | 38,121                        | 16,850               | 1,265                     | 4,554                          |
| multimodal | stromal     | 142,374                     | 61,606                   | 42,097                        | 14,588               | 754                       | 5,811                          |
| multimodal | Tcell       | 131,795                     | 44,828                   | 36,082                        | 16,450               | 1,264                     | 4,666                          |

**Supplementary Table 3.** CD4/CD8 promoter peak accessibility in cells across T cell chromatin classes. A plus sign (+) signifies that the CD4 or CD8 lineage promoter peak is accessible while a minus sign (-) signifies that it is not.

| Cell counts | Lineage promoter peak status |                             |            |
|-------------|------------------------------|-----------------------------|------------|
|             | CD8A+ CD4-                   | double positive or negative | CD8A- CD4+ |
| TA-0        | 1526                         | 5763                        | 84         |
| TA-1        | 391                          | 5584                        | 593        |
| TA-2        | 120                          | 3645                        | 601        |
| TA-3        | 35                           | 2847                        | 211        |
| TA-4        | 319                          | 1421                        | 28         |



**Supplementary Table 4.** The absolute cell counts and relative frequencies of OA and RA cells in each chromatin class.

| Chromatin Classes                          | Cell Counts |      | Cell Percentages |     |
|--------------------------------------------|-------------|------|------------------|-----|
|                                            | OA          | RA   | OA               | RA  |
| TA-0: CD8A+ GZMK+                          | 637         | 6736 | 9%               | 91% |
| TA-1: CD4+ IL7R+                           | 805         | 5763 | 12%              | 88% |
| TA-2: CD4+ PD-1+ TFH/TPH                   | 432         | 3934 | 10%              | 90% |
| TA-3: CD4+ IKZF2+ Treg                     | 357         | 2736 | 12%              | 88% |
| TA-4: CD8A+ PRF1+ cytotoxic                | 164         | 1604 | 9%               | 91% |
| SA-0: CXCL12+ HLA-DRhi sublining           | 1812        | 9921 | 15%              | 85% |
| SA-1: PRG4+ lining                         | 2210        | 7197 | 23%              | 77% |
| SA-2: CD34+ MFAP5+ sublining               | 371         | 2261 | 14%              | 86% |
| SA-3: MCAM+ mural                          | 69          | 466  | 13%              | 87% |
| MA-0: F13A1+ MARCKS+ TRM                   | 1251        | 5530 | 18%              | 82% |
| MA-1: FCN1+ SAMSN1+ infiltrating monocytes | 725         | 5460 | 12%              | 88% |
| MA-2: LYVE1+ TIMD4+ TRM                    | 1140        | 4866 | 19%              | 81% |
| MA-3: CD1C+ AFF3+ DC                       | 762         | 3028 | 20%              | 80% |
| MA-4: SPP1+ FABP5+ intermediate            | 303         | 2626 | 10%              | 90% |
| BA-0: CREB3L2+ plasma                      | 118         | 2752 | 4%               | 96% |
| BA-1: CD27+ plasma                         | 61          | 1590 | 4%               | 96% |
| BA-2: TOX+ PDE4D+ switched memory B        | 246         | 1201 | 17%              | 83% |
| BA-3: FCER2+ IGHD+ naive B                 | 237         | 1053 | 18%              | 82% |
| BA-4: CD24+ MAST4+ unswitched memory B     | 236         | 636  | 27%              | 73% |
| BA-5: ITGAX+ ABC                           | 116         | 395  | 23%              | 77% |
| EA-0: SELP+ venular                        | 238         | 2146 | 10%              | 90% |
| EA-1: RGCC+ capillary                      | 55          | 893  | 6%               | 94% |
| EA-2: SEMA3G+ arteriolar                   | 30          | 305  | 9%               | 91% |
| EA-3: PROX1+ lymphatic                     | 13          | 129  | 9%               | 91% |

**Supplementary Table 5.** RA risk variants with PIP>0.1 from Ishigaki, Sakaue, Terao, et al., Nat Genet, 2022 that overlap our trimmed peaks. SCENT genes are the SNP's best guess target gene from our sister study (Sakaue et al., Nat Genet, 2024). TF motifs from ArchR's JASPAR2020 motif set (Granja et al., Nat Genet., 2021; Castro-Mondragon, NAR, 2022). Peak class accessibility determined by scaled mean normalized peak accessibility over 24 classes and 11 peaks,  $z > 1$ .

| SNP rsID   | SNP chr | SNP start | SNP stop  | SNP PIP | SCENT gene      | SNP overlapping TF motif                        | Peak chr | Peak start | Peak stop | Peak class accessibility     |
|------------|---------|-----------|-----------|---------|-----------------|-------------------------------------------------|----------|------------|-----------|------------------------------|
| rs11209051 | chr1    | 67333211  | 67333212  | 0.1388  | IL12RB2, SERBP1 | NA                                              | chr1     | 67333106   | 67333306  | TA-0, TA-4, TA-2, TA-3       |
| rs798000   | chr1    | 116738073 | 116738074 | 0.9999  | CD2             | IRF1, STAT1/2,MEF2A, MEF2C, ZNF384              | chr1     | 116737968  | 116738168 | TA-0, TA-1, TA-2, TA-3       |
| rs734094   | chr11   | 2301989   | 2301990   | 0.4082  | LSP1            | ZBTB7A, ELF2                                    | chr11    | 2301916    | 2302116   | TA-4, MA-1, MA-3             |
| rs911760   | chr9    | 5438434   | 5438435   | 0.2241  | NA              | NA                                              | chr9     | 5438284    | 5438484   | TA-4, TA-1, BA-4, BA-5, BA-1 |
| rs663743   | chr11   | 64340262  | 64340263  | 0.2075  | NA              | ESR1                                            | chr11    | 64340084   | 64340284  | BA-3, BA-4, BA-2, BA-5       |
| rs3784099  | chr14   | 68283209  | 68283210  | 0.1061  | RAD51B          | ZNF382, HOXA10, HOXB13, HOXD3, CDX1, CDX2, CDX4 | chr14    | 68283072   | 68283272  | TA-1, TA-2, BA-3, BA-4, BA-2 |
| rs4840568  | chr8    | 11493509  | 11493510  | 0.1159  | CTSB            | NA                                              | chr8     | 11493501   | 11493701  | BA-3, BA-4, BA-2, BA-5       |
| rs9927316  | chr16   | 85982794  | 85982795  | 0.5360  | NA              | KLF2, KLF4, KLF5, KLF15, ZNF740                 | chr16    | 85982638   | 85982838  | MA-0, MA-2, MA-4, MA-1, MA-3 |
| rs72798636 | chr5    | 134506252 | 134506253 | 0.1257  | JADE2, PCBD2    | HIC2                                            | chr5     | 134506244  | 134506444 | EA-2, EA-0, EA-1, SA-1       |
| rs71508903 | chr10   | 62020111  | 62020112  | 0.1255  | NA              | NA                                              | chr10    | 62020060   | 62020260  | EA-2, EA-3, EA-0, EA-1       |
| rs7441808  | chr4    | 26088752  | 26088753  | 0.1404  | RBPJ            | NA                                              | chr4     | 26088619   | 26088819  | TA-2, SA-2                   |

**Supplementary Table 6.** Selected main results per chromatin class: TF motifs, transcriptional cell states, RA CNA associations, and RA risk variants. In column "RA CNA associations," clinical metrics and cell type abundance phenotypes (CTAPs) were listed if the AMP-RA reference cells within their Symphony-classified chromatin class were significantly expanded (+) or depleted (-) in association with that patient attribute (**Methods**).

| Cell type         | Chromatin class                            | TF motifs               | Corresponding transcriptional cell states                                                                         | RA CNA associations                                                        | RA risk variants                                 |
|-------------------|--------------------------------------------|-------------------------|-------------------------------------------------------------------------------------------------------------------|----------------------------------------------------------------------------|--------------------------------------------------|
| T cells           | TA-0: CD8A+ GZMK+                          | EOMES<br>TBX21<br>IRF4  | T-5: CD4+ GZMK+ memory<br>T-13: CD8+ GZMK/B+ memory<br>T-14: CD8+ GZMK+ memory<br>T-22: Vdelta1                   |                                                                            | rs11209051<br>rs798000                           |
|                   | TA-4: CD8A+ PRF1+ cytotoxic                | EOMES<br>TBX21<br>RUNX3 | T-12: CD4+ GNLY<br>T-15: CD8+ GZMB+/TEMRA<br>T-21: Innate-like<br>T-23: Vdelta2                                   | Lymphoid Aggregates (-)<br>Krenn (-)<br>CTAP-TB (-)                        | rs11209051<br>rs734094<br>rs911760               |
|                   | TA-1: CD4+ IL7R+                           | TCF7<br>LEF1<br>GATA3   | T-0: CD4+ IL7R+ memory<br>T-1: CD4+ CD161+ memory<br>T-4: CD4+ naive<br>T-16: CD8+ CD45ROlow/naive                |                                                                            | rs798000<br>rs911760<br>rs3784099                |
|                   | TA-2: CD4+ PD-1+ TFH/TPH                   | BATF<br>JUN<br>FOS      | T-3: CD4+ Tfh/Tph<br>T-7: CD4+ Tph<br>T-10: CD4+ OX40+ NR3C1+<br>T-11: CD4+ CD146+ memory                         | Krenn (+)<br>CTAP-TB (+)                                                   | rs11209051<br>rs798000<br>rs3784099<br>rs7441808 |
|                   | TA-3: CD4+ IKZF2+ Treg                     | KLF10<br>SP3            | T-8: CD4+ CD25-high Treg<br>T-9: CD4+ CD25-low Treg                                                               |                                                                            | rs11209051<br>rs798000                           |
| Stromal cells     | SA-1: PRG4+ lining                         | FOS<br>JUND<br>BATF     | F-0: PRG4+ CLIC5+ lining<br>F-1: PRG4+ lining                                                                     | CTAP-F (+)<br>CTAP-M (-)                                                   | rs72798636                                       |
|                   | SA-2: CD34+ MFAP5+ sublining               | NFATC4<br>NFATC3        | F-2: CD34+ sublining<br>F-4: DKK3+ sublining<br>F-7: NOTCH3+ sublining                                            | CTAP-F (+)                                                                 | rs7441808                                        |
|                   | SA-0: CXCL12+ HLA-DRhi sublining           | TEAD1<br>STAT1<br>STAT3 | F-6: CXCL12+ SFRP1+ sublining<br>F-5: CD74hi HLAhi sublining<br>F-3: POSTN+ sublining<br>F-8: RSPO3+ intermediate |                                                                            |                                                  |
|                   | SA-3: MCAM+ mural                          | KLF2<br>EBF1            | Mu-0: Mural                                                                                                       | CTAP-F (-)<br>CTAP-M (+)<br>CTAP-TF (-)                                    |                                                  |
| Myeloid cells     | MA-0: F13A1+ MARCKS+ TRM                   | RELA<br>SREBF2          | M-1: MERTK+ LYVE1-<br>M-9: DC3<br>M-8: PLCG2+<br>M-5: C1QA+<br>M-6: STAT1+ CXCL10+                                |                                                                            | rs9927316                                        |
|                   | MA-2: LYVE1+ TIMD4+ TRM                    | KLF4<br>NFIX<br>NFATC3  | M-0: MERTK+ LYVE1+<br>M-2: MERTK+ S100A8+                                                                         | Lymphoid Density (-)<br>CTAP-EFM (+)<br>CTAP-F (+)                         | rs9927316                                        |
|                   | MA-4: SPP1+ FABP5+ intermediate            | JUN<br>FOS              | M-3: MERTK+ HBEGF+<br>M-4: SPP1+                                                                                  | Lymphoid Density (+)<br>Lymphoid Aggregates (+)<br>Krenn (+)<br>CTAP-M (+) | rs9927316                                        |
|                   | MA-1: FCN1+ SAMSN1+ infiltrating monocytes | JUN<br>FOSL1<br>CEBPD   | M-7: IL1B+ FCN1+ HBEGF+<br>M-11: CD16+ DC4                                                                        | Lymphoid Aggregates (-)<br>CTAP-EFM (-)                                    | rs9927316<br>rs734094                            |
|                   | MA-3: CD1C+ AFF3+ DC                       | SPI1<br>IRF1<br>STAT1/2 | M-10: DC2<br>M-12: DC1<br>M-14: LAMP3+                                                                            |                                                                            | rs9927316<br>rs734094                            |
| B/plasma cells    | BA-3: FCER2+ IGHG+ naive B                 | SPIB<br>SPI1            | B-2: IgM+IgD+TCL1A+ naive                                                                                         | Lymphoid Aggregates (-)                                                    | rs663743<br>rs3784099<br>rs4840568               |
|                   | BA-4: CD24+ MAST4+ unswitched memory B     | NFKB1<br>ZBTB7A         | B-3: IgM+IgD+CD1c+ MZ-like<br>B-1: CD24hiCD27+IgM+ unswitched memory                                              |                                                                            | rs911760<br>rs663743<br>rs3784099<br>rs4840568   |
|                   | BA-2: TOX+ PDE4D+ switched memory B        | ETS1<br>RELA            | B-0: CD24+CD27+CD11b+ switched memory                                                                             | CTAP-TB (+)                                                                | rs663743<br>rs3784099<br>rs4840568               |
|                   | BA-5: ITGAX+ ABC                           | TBX19                   | B-5: CD11c+LAMP1+ ABC                                                                                             |                                                                            | rs911760<br>rs663743<br>rs4840568                |
|                   | BA-0: CREB3L2+ plasma                      | KLF2<br>SP3             | B-7: HLA-DR+IgG+ plasmablast<br>B-8: IgG1+IgG3+ plasma                                                            | CTAP-TB (-)                                                                |                                                  |
|                   | BA-1: CD27+ plasma                         | BATF<br>JUN             | B-6: IgM+ plasma                                                                                                  | CTAP-TB (-)                                                                | rs911760                                         |
| Endothelial cells | EA-2: SEMA3G+ arteriolar                   | SOX17                   | E-3: NOTCH4+ arteriolar                                                                                           |                                                                            | rs71508903<br>rs72798636                         |
|                   | EA-3: PROX1+ lymphatic                     |                         | E-4: Lymphatic                                                                                                    | CTAP-F (+)<br>CTAP-M (-)                                                   | rs71508903                                       |
|                   | EA-0: SELP+ venular                        | STAT3<br>NFIB           | E-1: LIFR+ venular<br>E-2: ICAM1+ venular                                                                         | CTAP-F (+)                                                                 | rs71508903<br>rs72798636                         |
|                   | EA-1: RGCC+ capillary                      | FOS<br>JUN              | E-0: SPARC+ capillary                                                                                             | CTAP-F (-)<br>CTAP-M (+)                                                   | rs71508903<br>rs72798636                         |
